# Supplementary material for: Support for midlife anxiety diagnosis as an independent risk factor for dementia: a systematic review
Source: PubMed Central journal article supplement — BMJ Open. 2018 Apr 30;8(4):e019399. doi: 10.1136/bmjopen-2017-019399 (PMC5969723; doi:10.1136/bmjopen-2017-019399), 2018-04-30
Supplement: bmjopen-2017-019399.draft_revisions.pdf [file bmjopen-2017-019399.draft_revisions.pdf]

# BMJ Open

BMJ Open is committed to open peer review. As part of this commitment we make the peer review history of every article we publish publicly available.

When an article is published we post the peer reviewers' comments and the authors' responses online. We also post the versions of the paper that were used during peer review. These are the versions that the peer review comments apply to.

The versions of the paper that follow are the versions that were submitted during the peer review process. They are not the versions of record or the final published versions. They should not be cited or distributed as the published version of this manuscript.

BMJ Open is an open access journal and the full, final, typeset and author-corrected version of record of the manuscript is available on our site with no access controls, subscription charges or pay-per-view fees (<http://bmjopen.bmj.com>).

If you have any questions on BMJ Open's open peer review process please email [info.bmjopen@bmj.com](mailto:info.bmjopen@bmj.com)

# BMJ Open

## Support for mid-life anxiety diagnosis as an independent risk factor for dementia: a systematic review.

|                                 |                                                                                                                                                                                                                                                                                                                                              |
|---------------------------------|----------------------------------------------------------------------------------------------------------------------------------------------------------------------------------------------------------------------------------------------------------------------------------------------------------------------------------------------|
| Journal:                        | <i>BMJ Open</i>                                                                                                                                                                                                                                                                                                                              |
| Manuscript ID                   | bmjopen-2017-019399                                                                                                                                                                                                                                                                                                                          |
| Article Type:                   | Research                                                                                                                                                                                                                                                                                                                                     |
| Date Submitted by the Author:   | 30-Aug-2017                                                                                                                                                                                                                                                                                                                                  |
| Complete List of Authors:       | Gimson, Amy; University of Southampton Faculty of Health Sciences, Medicine<br>Schlosser, Marco; University College London Division of Psychiatry<br>Huntley, Jonathan; Institute of Psychiatry, Old Age Psychiatry; University College London Division of Psychiatry<br>Marchant, Natalie; University College London Division of Psychiatry |
| <b>Primary Subject Heading</b>: | Mental health                                                                                                                                                                                                                                                                                                                                |
| Secondary Subject Heading:      | Geriatric medicine, Neurology                                                                                                                                                                                                                                                                                                                |
| Keywords:                       | Dementia < NEUROLOGY, Anxiety disorders < PSYCHIATRY, EPIDEMIOLOGY                                                                                                                                                                                                                                                                           |
|                                 |                                                                                                                                                                                                                                                                                                                                              |

SCHOLARONE™  
Manuscripts

1  
2  
3 **Support for mid-life anxiety diagnosis as an independent risk factor for**  
4 **dementia: a systematic review.**  
5  
6  
7

8 Authors: Amy Gimson<sup>1</sup>, Marco Schlosser<sup>2</sup>, Jonathan D. Huntley<sup>2,3</sup>, Natalie L. Marchant<sup>2</sup>  
9

10  
11 Institution:

12 <sup>1</sup> University of Southampton, Faculty of Medicine, Southampton, UK

13 <sup>2</sup> University College London, Division of Psychiatry, London, UK

14 <sup>3</sup> Kings College London, Institute of Psychiatry, London, UK  
15  
16  
17

18 Correspondence to: Natalie L Marchant, n.marchant@ucl.ac.uk  
19  
20  
21  
22  
23  
24  
25  
26  
27  
28  
29  
30  
31  
32  
33  
34  
35  
36  
37  
38  
39  
40  
41  
42  
43  
44  
45  
46  
47  
48  
49  
50  
51  
52  
53  
54  
55  
56  
57  
58  
59  
60

## Abstract

**Objectives:** Anxiety is an increasingly recognised predictor of cognitive deterioration in older adults and those with mild cognitive impairment (MCI). Often believed to be a prodromal feature of neurodegenerative disease, anxiety in mid-life and older age may potentially act as an independent risk factor for dementia.

**Design:** A systematic review of the literature on anxiety diagnosis and long-term risk for dementia was performed following published guidelines.

**Setting and participants:** Electronic databases were searched for peer-reviewed journals up until 8 March 2017. Publications reporting hazard/odds ratios for all-cause dementia based on clinical criteria from prospective cohort or case-control studies were selected. Included studies measured clinically significant anxiety in isolation or after controlling for symptoms of depression, and reported a mean interval between anxiety assessment and dementia diagnosis of at least 10 years. Methodological quality assessments were performed using the Newcastle-Ottawa scale.

**Outcome measure:** HR/ORs for all cause dementia.

**Results** Searches yielded 3510 articles, of which four (0.02%) were eligible. The studies had a combined sample size of 29,819, and all studies found a positive association between clinically significant anxiety and future dementia. Due to the heterogeneity between studies, a meta-analysis was not conducted.

**Conclusions** Clinically significant anxiety in mid-life was associated with an increased risk of dementia over an interval of at least 10 years. These findings indicate that anxiety may be a risk factor for late-life dementia. With increasing focus on identifying modifiable risk factors

1  
2  
3 for dementia, more high quality prospective studies are required to clarify whether clinical  
4  
5 anxiety is a risk factor for dementia, separate from a prodromal symptom.  
6  
7

#### 8 **Strengths and limitations of this study:**

9

- 10  
11 • This systematic review used a rigorous methodology, with broad search terms and  
12 precisely pre-defined inclusion and exclusion criteria to investigate a life-course  
13 association between a potentially modifiable risk factor, anxiety, and dementia.  
14
- 15  
16 • Strict exclusion criteria were used to remove studies that did not either discuss  
17 anxiety diagnosis alone or control for depression, to account for high levels of  
18 anxiety-depression comorbidity  
19
- 20  
21 • Study quality was formally investigated using the Newcastle-Ottawa scale  
22
- 23  
24 • The review was limited by the lack of assessment of cognition at baseline in  
25 retrospective studies, however, the length of look-back, minimises the likelihood of  
26 cognitive impairment at baseline  
27
- 28  
29 • The small number and heterogeneity of study designs rendered a meta-analysis  
30 inappropriate, therefore formal statistical analyses could not be performed  
31  
32  
33  
34  
35  
36  
37  
38  
39  
40

#### 41 **Introduction**

42  
43 Dementia, and more specifically Alzheimer's disease (AD), is a progressive neurocognitive  
44 disease. In the absence of any disease modifying treatments, there is increasing focus on  
45 primary prevention to reduce risk of its development, and on early intervention to  
46 potentially slow the progression of dementia. A better understanding of risk factors for  
47 dementia is therefore vital for improving therapeutic interventions. Alongside a number of  
48 well described cardiovascular risk factors [1] increasing evidence has highlighted the  
49  
50  
51  
52  
53  
54  
55  
56  
57  
58  
59  
60

1  
2  
3 association between psychiatric illnesses and the development of late-onset dementia  
4  
5 (Marchant & Howard, 2015). Further work is needed to understand whether these  
6  
7 psychiatric symptoms and illnesses represent prodromal symptoms or act as independent  
8  
9 risk factors. Depression has been consistently related to the development of dementia [2].  
10  
11 Three meta-analyses have reported that a diagnosis of depression is associated with up to a  
12  
13 twofold increase in risk for dementia [2–4]. Ownby and colleagues further report that a  
14  
15 longer interval between diagnosis of depression and diagnosis of dementia is significantly  
16  
17 associated with an increased odds ratio (OR) of developing dementia. This substantiates  
18  
19 interpretations of depression as a risk factor for developing dementia, whereas a stronger  
20  
21 association over shorter intervals would have been more indicative of prodromal symptoms  
22  
23 [2], however a recent study opposes this [5].  
24  
25  
26  
27

28  
29 Although anxiety is a prevalent psychiatric disorder [6] and commonly co-occurs with  
30  
31 depression, the impact of anxiety on risk for cognitive decline and dementia has been far  
32  
33 less studied. Anxiety symptoms are commonly experienced in the years preceding a  
34  
35 dementia diagnosis [7], and have been associated with cognitive decline and the  
36  
37 progression from MCI to AD [8–10]. A recent review reported that anxiety and  
38  
39 neuropsychiatric symptoms not reaching clinically diagnostic levels were associated with  
40  
41 increased risk of dementia [11]. The authors indicated that anxiety was likely a prodromal  
42  
43 symptom of dementia in these community samples. This may well have been the case,  
44  
45 particularly given the relatively short intervals between assessment of anxiety symptoms  
46  
47 and assessment of dementia, however, this does not preclude anxiety also being a risk  
48  
49 factor. This could more easily be investigated with longer intervals between anxiety  
50  
51 assessment and dementia diagnosis, as the studies that have investigated this association  
52  
53 within a 5-10 year interval have reported variable results [12,13].  
54  
55  
56  
57  
58  
59  
60

1  
2  
3 The average length of prodromal preclinical cognitive decline has been proposed to be  
4  
5 between 5-6 years [14], and individuals diagnosed with MCI may progress to AD within 5  
6  
7 years [15]. Therefore, examining studies with at least a 10-year interval between anxiety  
8  
9 assessment and dementia diagnosis would increase likelihood that anxiety is independent  
10  
11 from the dementia prodrome.  
12  
13

14  
15 It is possible that anxiety symptoms meeting diagnostic threshold will have a stronger  
16  
17 association with dementia than general symptoms because this has been shown with  
18  
19 depression [3]. To date, there has been no systematic review to investigate the association  
20  
21 between clinically significant anxiety and dementia. The aim of this study was therefore to  
22  
23 review the literature examining the association between clinically significant levels of  
24  
25 anxiety and dementia risk over a longer timescale (>10 years).  
26  
27

## 28 29 **Methods**

30  
31 This systematic review followed the Preferred Reporting Items for Systematic Reviews and  
32  
33 Meta-analyses (PRISMA) and Centre for Reviews and Dissemination (CRD) guidance for  
34  
35 undertaking reviews in health care [16].  
36  
37

### 38 39 *Search strategy*

40  
41 A systematic literature search of MEDLINE, PSYCINFO and EMBASE databases was  
42  
43 conducted of articles published up until 8<sup>th</sup> March 2017 to identify articles reporting  
44  
45 analyses of the association between anxiety (as defined by clinical diagnosis or self-report  
46  
47 scales with a clinically significant threshold) and dementia or MCI incidence. Search terms  
48  
49 used consisted of: (dement\* OR Alzheimer\* OR "mild cognitive impairment" OR MCI) AND  
50  
51 (anx\* OR "generalised anxiety disorder" OR GAD) AND (risk\* OR odds). We aimed to identify  
52  
53 articles discussing (1) diagnosis of any type of dementia or MCI, (2) anxiety diagnosis, and  
54  
55  
56  
57  
58  
59  
60

1  
2  
3 (3) risk of dementia. The search was restricted to human studies and those published in  
4  
5 English. Reference lists were searched for additional relevant articles. Searches were  
6  
7 conducted by a single reviewer (AG). An independent review of all screened articles was  
8  
9 conducted by a second reviewer (MS). Any disagreement was resolved by consensus with a  
10  
11 third reviewer (NM).  
12  
13

### 14 15 *Selection Criteria and Article Screening*

16  
17 Inclusion criteria were 1) a diagnosis of anxiety or an assessment of anxiety symptoms  
18  
19 meeting diagnostic criteria using a standardised assessment tool, excluding populations with  
20  
21 post-traumatic stress disorder (PTSD) or obsessive-compulsive disorder (OCD); 2)  
22  
23 population-based studies where anxiety is assessed at least – on average – 10 years  
24  
25 preceding final clinical assessment for dementia in line with previous meta-analyses on  
26  
27 depression using intervals of at least 10 years [2]; 3) a diagnosis of dementia using validated  
28  
29 criteria (e.g. Diagnostic Statistical Manual III-IV (DSM III-IV), International Classification of  
30  
31 Diseases 10 (ICD-10)); 4) late-onset dementia diagnoses (aged  $\geq 65$  years). Eligible articles  
32  
33 were identified by performing an initial screen of titles and abstracts, followed by a full  
34  
35 article review of those that passed screening. All retrospective and prospective studies that  
36  
37 met these criteria were selected.  
38  
39  
40  
41  
42

### 43 *Data extraction*

44  
45 Outcome measures related to anxiety and dementia diagnosis were independently  
46  
47 extracted by two authors (AG, MS). Disagreements were resolved through discussion. Study  
48  
49 design, sample characteristics (including educational level and age), follow-up length,  
50  
51 dropout rate, anxiety (including measure and baseline score where appropriate), criteria for  
52  
53 assessing dementia, and measurements of depression as a confounder (including measure  
54  
55  
56  
57  
58  
59  
60



1  
2  
3 and baseline score), were recorded. In cases of insufficient data, authors were contacted by  
4  
5 email.

6  
7  
8 INSERT FIGURE 1  
9

### 10 *Study Quality*

11  
12 Two authors (AG, MS) independently assessed study quality and risk of bias using the  
13  
14 Newcastle-Ottawa scale, which contains separate quality assessment instruments for case-  
15  
16 control and cohort studies.  
17  
18

## 19 **Results**

### 20 *Literature Search*

21  
22 The literature search detected 3509 citations, of which two were duplicates. One further  
23  
24 paper was identified manually during reference screening. After screening titles and  
25  
26 abstracts, 18 full-text articles were assessed for eligibility. Fourteen articles were excluded  
27  
28 based on criteria described earlier (Figure 1), four studies were included in the final review.  
29  
30  
31  
32  
33

### 34 *Study Characteristics*

35  
36 Characteristics of the four selected studies are shown in Table 1. Clinically significant anxiety  
37  
38 was documented based on clinical diagnosis using International Classification of Diseases 10  
39  
40 (ICD-10) criteria (n = 2), the State Trait Anxiety Inventory (STAI, n = 1) and a subscale of the  
41  
42 State Trait Personality Inventory (STPI, n = 1).  
43  
44  
45

46  
47 Gallacher et al. (2009) measured anxiety using the STAI, which has a range from 20 to 80  
48  
49 [17]. This questionnaire is arguably the gold standard for assessing anxiety symptoms. A  
50  
51 clinically significant cut-off of 39-40 has been proposed [18,19]. Gallacher et al. (2009)  
52  
53 categorised 'high anxiety' as having a STAI score between 35 and 72, compared to a 'low  
54  
55  
56  
57  
58  
59  
60

1  
2  
3 anxiety' group who had a STAI score between 20 and 34. Boot et al. (2013) and Zilkens et al.  
4  
5 (2014) used ICD-10 criteria to diagnose an anxiety disorder.  
6

7  
8 Petkus et al. (2016) assessed anxiety using state anxiety subscale of the State-Trait  
9  
10 Personality Inventory (STPI), which contains a subset of items from the STAI. Participants  
11  
12 scoring at least one standard deviation above the population mean, equating to a score of  
13  
14  $\geq 25$  out of 40, were categorised having 'high anxiety'. This cut-off indicated clinically  
15  
16 significant anxiety, therefore rendering the study suitable for inclusion in this review.  
17  
18

19  
20 Dementia diagnosis was in most cases assessed using DSM III-IV (n = 2) or ICD-10 criteria (n  
21  
22 = 1), although the study by Boot et al. (2013) assessed Dementia with Lewy Bodies (DLB) by  
23  
24 clinical diagnosis using published criteria [20].  
25

26  
27 Sample sizes of the studies ranged from 441 to 27 136 participants, recruited from both or  
28  
29 either community and hospital inpatient/outpatient populations. Gallacher et al. (2009) and  
30  
31 Petkus et al. (2016) conducted prospective cohort studies using community populations that  
32  
33 excluded dementia at baseline. Zilkens et al. (2014), and Boot et al. (2013) conducted  
34  
35 matched case-control studies, which analysed community and hospital records for anxiety  
36  
37 diagnosis and therefore did not include a cognitive assessment at baseline to exclude  
38  
39 dementia. The proportion of females in each study ranged from 0 to 56.6%. Educational  
40  
41 level was recorded for all but one study; which ranged from 55% with no qualifications to  
42  
43 95% with >9 years of education.  
44  
45  
46  
47

48  
49 INSERT TABLE 1  
50

### 51 *Anxiety diagnosis association with dementia*

52  
53 All studies included in this review found a significant increase in the number of dementia  
54  
55 diagnoses in patients who had a clinical anxiety diagnosis or experienced clinically significant  
56  
57  
58  
59

1  
2  
3 anxiety symptoms on average at least 10 years prior to their diagnosis of dementia; Zilkens  
4  
5 et al. (2014): OR = 1.61 (95% CI 1.28-2.02), Boot et al. (2013): OR = 7.4 (95% CI 3.5-16),  
6  
7 Gallacher et al. (2009): OR = 1.62 (95% CI 0.59-4.41) and Petkus et al. (2016): OR = 1.48 (95%  
8  
9 CI 1.01-2.18), respectively.  
10

11  
12 Each study controlled for a range of demographic factors, with all controlling for vascular  
13  
14 and other psychiatric risk factors (Table 2 and 3). All studies assessed and controlled for  
15  
16 depression symptoms in their analysis. Boot et al. (2013) found a stronger association  
17  
18 between anxiety diagnosis alone with future dementia than either depression diagnosis  
19  
20 alone or mixed anxiety and depression diagnosis, although the number of individuals with  
21  
22 anxiety was markedly larger than those in the other two categories (anxiety alone n=168;  
23  
24 depression alone n=52; anxiety and depression n=56). Although Zilkens et al. (2014)  
25  
26 assessed a range of psychiatric diagnoses including anxiety and depression, they did not  
27  
28 assess their interaction. Petkus et al. (2016) and Gallacher et al. (2009), whilst controlling for  
29  
30 depression, made no assessment of the comparative strength of relationship or their  
31  
32 interaction.  
33  
34  
35  
36  
37

### 38 *Study Quality Rating*

39  
40 All studies included were rated highly on the Newcastle-Ottawa scale [21]. From a maximum  
41  
42 score of 9, Boot et al (2013) was rated 8; and Zilkens et al. (2014), Petkus et al. (2016) and  
43  
44 Gallacher et al. (2009) were each rated 7. These studies were of similar quality to those  
45  
46 included in a recent meta-analysis examining dementia risk estimates associated with late-  
47  
48 life depression [3].  
49

50  
51  
52 Three of the studies had representative samples of community populations; the fourth led  
53  
54 by Gallacher et al. (2009) included only men. All controlled for a range of both demographic,  
55  
56  
57  
58  
59

1  
2  
3 physical and psychological health factors. All outcomes were assessed either via secure  
4 health records, or independent validation. Gallacher et al. (2009) experienced 20% loss to  
5 follow-up, which compares favourably to the pre-mentioned Cherbuin et al. (2015) review  
6 which considered studies with an attrition rate of between 4.3% and 55.46%, and a review  
7 of MCI drug studies with attrition rates varying from 12% to 49% [22]. Petkus et al. (2016)  
8 did not clearly report loss to follow-up. For both case-control studies, the primary care  
9 records did not include a cognitive assessment at baseline. Therefore, pre-existing cognitive  
10 impairment before diagnosis cannot be ruled out, although long look-back periods make this  
11 less likely.  
12  
13  
14  
15  
16  
17  
18  
19  
20  
21  
22  
23

24 INSERT TABLE 2

25  
26  
27 INSERT TABLE 3

## 28 29 30 **Discussion**

31  
32 We systematically reviewed evidence for a relationship between clinically significant anxiety  
33 and risk of late-onset dementia over a mean interval of at least 10 years from anxiety  
34 assessment to dementia diagnosis. Four studies met inclusion criteria, and each were of  
35 high quality. All studies found an association between clinically significant anxiety and  
36 increased likelihood of a dementia diagnosis, even after accounting for potential  
37 confounders (including depression symptoms).  
38  
39  
40  
41  
42  
43  
44  
45

46 Anxiety symptomatology has previously been related to dementia risk and cognitive decline,  
47 although not conclusively [9,23]. A recent systematic review reported a positive association  
48 between anxiety symptoms and dementia diagnosis over a short time interval [11]. Further,  
49 the association was stronger with smaller intervals between assessment of anxiety and  
50 dementia diagnosis. As a result, the authors concluded that anxiety may result from a  
51  
52  
53  
54  
55  
56  
57  
58  
59  
60

1  
2  
3 prodromal state of dementia, where an increase in anxiety may be due to an individual's  
4  
5 insight into their early, subjective experience of cognitive decline [11]. Given the short time  
6  
7 interval between assessments, Gulpers et al. were unable to determine whether anxiety  
8  
9 could also serve as an independent risk for dementia. This review reports solely articles that  
10  
11 were not included Gulpers et al.'s analyses, and therefore furthers their work by providing  
12  
13 an independent assessment of the anxiety-dementia association.  
14  
15

16  
17 The prodromal phase of dementia can begin several years before objective dementia is  
18  
19 manifest. In the present review, we sought to minimise the potential influence of pre-  
20  
21 clinical cognitive decline by including only studies that assessed anxiety and dementia  
22  
23 diagnoses over an extended period. Three studies (Zilkens et al. 2014; Gallacher et al. 2009;  
24  
25 Petkus et al. 2016) demonstrated a mean interval of at least 10 years between the anxiety  
26  
27 and dementia evaluations. Boot et al. (2013) analysed participant's lifelong medical record,  
28  
29 however, the mean interval between anxiety and dementia diagnosis was not reported. The  
30  
31 results summarised here suggest that anxiety may also be an independent risk for dementia.  
32  
33  
34

35  
36 Findings from this review corroborate recent evidence that anxiety symptoms or diagnosis  
37  
38 are associated with risk of MCI [28,29]. These findings further complement the association  
39  
40 between depression and dementia diagnosis [3], which is particularly relevant due to high  
41  
42 levels of anxiety-depression comorbidity. Moreover, they lend support for the proposal that  
43  
44 multiple psychiatric risk factors are implicated together as a latent risk factor for dementia  
45  
46 [30].  
47  
48

49  
50 It has recently been suggested that a longer interval period between anxiety and dementia  
51  
52 diagnosis may provide evidence for a common biological pathway linking anxiety,  
53  
54 depression, and dementia [26]. An abnormal stress response, such as exhibited in anxiety  
55  
56  
57  
58  
59

1  
2  
3 disorders, may be associated with accelerated cellular ageing and neuro-progression (a  
4  
5 pathological reorganisation of the central nervous system) resulting in increased  
6  
7 neurodegeneration, neuronal apoptosis and lowered neuroplasticity [31]. Although  
8  
9 glucocorticoid, inflammatory mediator and vascular disease mechanisms are hypothesised  
10  
11 [2,32], as yet, no convincing candidate biological mechanism linking anxiety and cognitive  
12  
13 impairment exists.  
14  
15

16  
17 The results of this review should be interpreted in the light of their limitations. Only studies  
18  
19 that had been published and written in English were included, which may limit extrapolation  
20  
21 across broader populations. Retrospective studies did not examine baseline cognition and  
22  
23 therefore cannot exclude early cognitive decline at the time of anxiety assessment,  
24  
25 however, the length of look-back, ranging from over 10 years to the first entry of an  
26  
27 individual's medical record, minimises the likelihood of cognitive impairment at baseline. To  
28  
29 account for high levels of anxiety-depression comorbidity, this review included only papers  
30  
31 discussing anxiety diagnosis alone, or those that controlled for depression symptomatology.  
32  
33 However, the Zilkens et al. (2014) and Boot et al. (2013) cannot completely exclude overlap  
34  
35 of these two commonly comorbid illnesses because their occurrence was ascertained from  
36  
37 lists of diagnoses in medical records. Furthermore, results must be interpreted in the light of  
38  
39 proposals that the prodromal AD pathophysiologic processes may develop beyond 10 years  
40  
41 before the onset of clinical symptoms [33].  
42  
43  
44  
45  
46

47 Whether reducing anxiety in middle-age would result in reduced risk of dementia remains  
48  
49 an open question. The effect of treatment of anxiety using pharmacologic and non-  
50  
51 pharmacologic therapies during midlife on later risk for dementia has not yet been  
52  
53 investigated. Benzodiazepines, commonly used in the treatment of anxiety, have been  
54  
55  
56  
57  
58  
59  
60

1  
2  
3 shown to increase risk of mortality in some groups [34]. It is possible that diverse non-  
4  
5 pharmacological therapies, including talking therapies [35] and mindfulness-based  
6  
7 interventions and meditation practices [36], that are known to reduce anxiety in midlife,  
8  
9 could have a risk-reducing effect, although this is yet to be thoroughly researched.  
10

11  
12 Given the high prevalence of anxiety seen in primary care, we suggest that general  
13  
14 practitioners could consider anxiety alongside depression as an indicator of risk factor for  
15  
16 dementia. To improve the rate of earlier diagnosis of dementia, close monitoring of subtle  
17  
18 cognitive decline in older adults with a history of anxiety, depression and cerebrovascular  
19  
20 disease would be encouraged. This review expands our understanding of anxiety as a  
21  
22 potentially modifiable risk for dementia. Given the limited number of studies investigating  
23  
24 the anxiety-dementia relationship, further research is required to assess underlying  
25  
26 mechanisms that link these disorders, and to disambiguate anxiety's potential role as a risk  
27  
28 factor as separate from a prodromal symptom of dementia.  
29  
30  
31

### 32 33 **Acknowledgements**

34  
35 This work was supported by a grant from the British Geriatrics Society. We would like to  
36  
37 thank Dr Bradley Boeve (Mayo Clinic College of Medicine, Rochester), Dr Claire Burton  
38  
39 (Keele University), and Dr Andrew Petkus (University of Southern California) for providing  
40  
41 clarification of articles screened for inclusion in support of this work. NLM was supported by  
42  
43 University College London and Alzheimer's Society (AS-SF-15b-002). JDH was funded by an  
44  
45 MRC research training fellowship (G0901982).  
46  
47  
48  
49  
50

### 51 **Contributors**

1  
2  
3 AG contributed to design of the study, data screening and extraction, drafting of the  
4  
5 manuscript and submission. MS contributed to literature search, data screening and  
6  
7 extraction, and manuscript preparation. JDH contributed to the study design, provided  
8  
9 methodological expertise and editing of the manuscript. NLM contributed to the  
10  
11 conception and study design, data interpretation, and editing of the manuscript.  
12  
13

### 14 15 **Competing interests**

16  
17  
18 None of the contributing authors have any conflicting interests to declare.  
19  
20

### 21 22 **Data sharing statement**

23  
24  
25 No additional data are available.  
26  
27

### 28 29 **References**

- 30  
31 [1] Fillit H, Nash D, Rundek T, Zuckerman A. Cardiovascular risk factors and dementia.  
32 Am J Geriatr Pharmacother 2008;6:100–18.
- 33  
34 [2] Ownby R, Crocco E, Acevedo A, John V, Loewenstein D. Depression and Risk for  
35 Alzheimer Disease: a systematic review, meta-analysis and metaregression analysis.  
36 Arch Gen Psychiatry 2006;63:530.
- 37  
38 [3] Cherbuin N, Kim S, Anstey KJ. Dementia risk estimates associated with measures of  
39 depression: a systematic review and meta-analysis. BMJ Open 2015;5:e008853.
- 40  
41 [4] Diniz BS, Butters MA, Albert SM, Dew MA, Reynolds CF, Byers A, et al. Late-life  
42 depression and risk of vascular dementia and Alzheimer's disease: systematic review  
43 and meta-analysis of community-based cohort studies. Br J Psychiatry 2013;202:329–  
44 35.
- 45  
46 [5] Singh-Manoux A, Dugravot A, Fournier A, Abell J, Ebmeier K, Kivimäki M, et al.  
47 Trajectories of Depressive Symptoms Before Diagnosis of Dementia. JAMA  
48 Psychiatry 2017;74:712.
- 49  
50 [6] Bandelow B, Michaelis S. Epidemiology of anxiety disorders in the 21st century.  
51 Dialogues Clin Neurosci 2015;17:327–35.
- 52  
53 [7] Gallagher D, Coen R, Kilroy D, Belinski K, Bruce I, Coakley D, et al. Anxiety and  
54 behavioural disturbance as markers of prodromal Alzheimer's disease in patients with  
55 mild cognitive impairment. Int J Geriatr Psychiatry 2011;26:166–72.
- 56  
57 [8] Palmer K, Berger AK, Monastero R, Winblad B, Backman L, Fratiglioni L. Predictors  
58  
59



- of progression from mild cognitive impairment to Alzheimer disease. *Neurology* 2007;68:1596–602.
- [9] Yochim BP, Mueller AE, Segal DL. Late life anxiety is associated with decreased memory and executive functioning in community dwelling older adults. *J Anxiety Disord* 2013;27:567–75.
- [10] Beaudreau SA, O'Hara R. Late-life anxiety and cognitive impairment: a review. *Am J Geriatr Psychiatry* 2008;16:790–803.
- [11] Gulpers B, Ramakers I, Hamel R, Kohler S, Voshaar R, Verhey F. Anxiety as a Predictor for Cognitive Decline and Dementia: A Systematic Review and Meta-analysis. *Am J Geriatr Psychiatry* 2016.
- [12] de Bruijn RFAG, Direk N, Mirza SS, Hofman A, Koudstaal PJ, Tiemeier H, et al. Anxiety is not associated with the risk of dementia or cognitive decline: the Rotterdam Study. *Am J Geriatr Psychiatry* 2014;22:1382–90.
- [13] Burton C, Campbell P, Jordan K, Strauss V, Mallen C. The association of anxiety and depression with future dementia diagnosis: A case-control study in primary care. *Fam Pract* 2013;30:25–30.
- [14] Wilson RS, Leurgans SE, Boyle PA, Bennett DA. Cognitive decline in prodromal Alzheimer disease and mild cognitive impairment. *Arch Neurol* 2011;68:351–6.
- [15] Gauthier S, Reisberg B, Zaudig M, Petersen RC, Ritchie K, Broich K, et al. Mild cognitive impairment. *Lancet* 2006;367:1262–70.
- [16] Centre for Reviews and Dissemination. CRD's Guidance for undertaking reviews in health care. 2009.
- [17] Spielberger C. *Manual for the State-Trait Anxiety Inventory*. 1983.
- [18] Julian LJ. Measures of anxiety: State-Trait Anxiety Inventory (STAI), Beck Anxiety Inventory (BAI), and Hospital Anxiety and Depression Scale-Anxiety (HADS-A). *Arthritis Care Res (Hoboken)* 2011:S467-72.
- [19] Knight RG, Waal-Manning HJ, Spears GF. Some norms and reliability data for the State-Trait Anxiety Inventory and the Zung Self-Rating Depression scale. *Br J Clin Psychol* 1983;22:245–9.
- [20] McKeith IG, Dickson DW, Lowe J, Emre M, O'Brien JT, Feldman H, et al. Diagnosis and management of dementia with Lewy bodies: Third report of the DLB consortium. *Neurology* 2005;65:1863–72.
- [21] Wells G, Shea B, O'Connell D, Peterson J, Welch V, Losos M, et al. The Newcastle-Ottawa Scale (NOS) for assessing the quality if nonrandomized studies in meta-analyses. (Available from URL [http://www.ohri.ca/programs/clinical\\_epidemiology/oxford.asp](http://www.ohri.ca/programs/clinical_epidemiology/oxford.asp)) 2012:2012.
- [22] Jelic V, Kivipelto M, Winblad B. Clinical trials in mild cognitive impairment: lessons for the future. *J Neurol Neurosurg Psychiatry* 2006;77:429–38.
- [23] Bierman EJM, Comijs HC, Rijmen F, Jonker C, Beekman ATF. Anxiety symptoms and cognitive performance in later life: results from the longitudinal aging study

- 1  
2  
3 Amsterdam. *Aging Ment Health* 2008;12:517–23.
- 4  
5 [24] Zilkens RR, Bruce DG, Duke J, Spilisbury K, Semmens JB. Severe psychiatric  
6 disorders in mid-life and risk of dementia in late-life (age 65-84 years): A population  
7 based case-control study. *Curr Alzheimer Res* 2014;11:681–93.
- 8  
9 [25] Boot BP, Orr CF, Ahlskog JE, Ferman TJ, Roberts R, Pankratz VS, et al. Risk factors  
10 for dementia with Lewy bodies: a case-control study. *Neurology* 2013;81:833–40.
- 11  
12 [26] Gallacher J, Bayer A, Fish M, Pickering J, Pedro S, Dunstan F, et al. Does anxiety  
13 affect risk of dementia? Findings from the Caerphilly Prospective Study. *Psychosom*  
14 *Med* 2009;71:659–66.
- 15  
16 [27] Petkus AJ, Reynolds CA, Wetherell JL, Kremen WS, Pedersen NL, Gatz M, et al.  
17 Anxiety is associated with increased risk of dementia in older Swedish twins.  
18 *Alzheimer's Dement* 2016;12:399–406.
- 19  
20 [28] Jacob L, Bohlken J, Kostev K. Risk Factors for Mild Cognitive Impairment in German  
21 Primary Care Practices. *J Alzheimer's Dis* 2017;56:379–84.
- 22  
23 [29] Kassem AM, Ganguli M, Yaffe K, Hanlon JT, Lopez OL, Wilson JW, et al. Anxiety  
24 symptoms and risk of dementia and mild cognitive impairment in the oldest old  
25 women. *Aging Ment Health* 2017:1–9.
- 26  
27 [30] Marchant NL, Howard RJ. Cognitive debt and Alzheimer's disease. *J Alzheimers Dis*  
28 2015;44:755–70.
- 29  
30 [31] Perna G, Iannone G, Alciati A, Caldirola D. Are Anxiety Disorders Associated with  
31 Accelerated Aging? A Focus on Neuroprogression. *Neural Plast* 2016;2016:1–19.
- 32  
33 [32] Sapolsky RM. Glucocorticoids and hippocampal atrophy in neuropsychiatric disorders.  
34 *Arch Gen Psychiatry* 2000;57:925–35.
- 35  
36 [33] Pietrzak RH, Lim YY, Neumeister A, Ames D, Ellis KA, Harrington K, et al. Amyloid- $\beta$ ,  
37 anxiety, and cognitive decline in preclinical Alzheimer disease: a multicenter,  
38 prospective cohort study. *JAMA Psychiatry* 2015;72:284–91.
- 39  
40 [34] Fontanella CA, Campo J V., Phillips GS, Hiance-Steelesmith DL, Sweeney HA, Tam  
41 K, et al. Benzodiazepine Use and Risk of Mortality Among Patients With  
42 Schizophrenia. *J Clin Psychiatry* 2016;77:661–7.
- 43  
44 [35] Orgeta V, Qazi A, Spector AE, Orrell M. Psychological treatments for depression and  
45 anxiety in dementia and mild cognitive impairment. In: Orgeta V, editor. *Cochrane*  
46 *Database Syst. Rev.*, Chichester, UK: John Wiley & Sons, Ltd; 2014.
- 47  
48 [36] Khoury B, Lecomte T, Fortin G, Masse M, Therien P, Bouchard V, et al. Mindfulness-  
49 based therapy: A comprehensive meta-analysis. *Clin Psychol Rev* 2013;33:763–71.
- 50  
51  
52  
53  
54  
55  
56  
57  
58  
59  
60

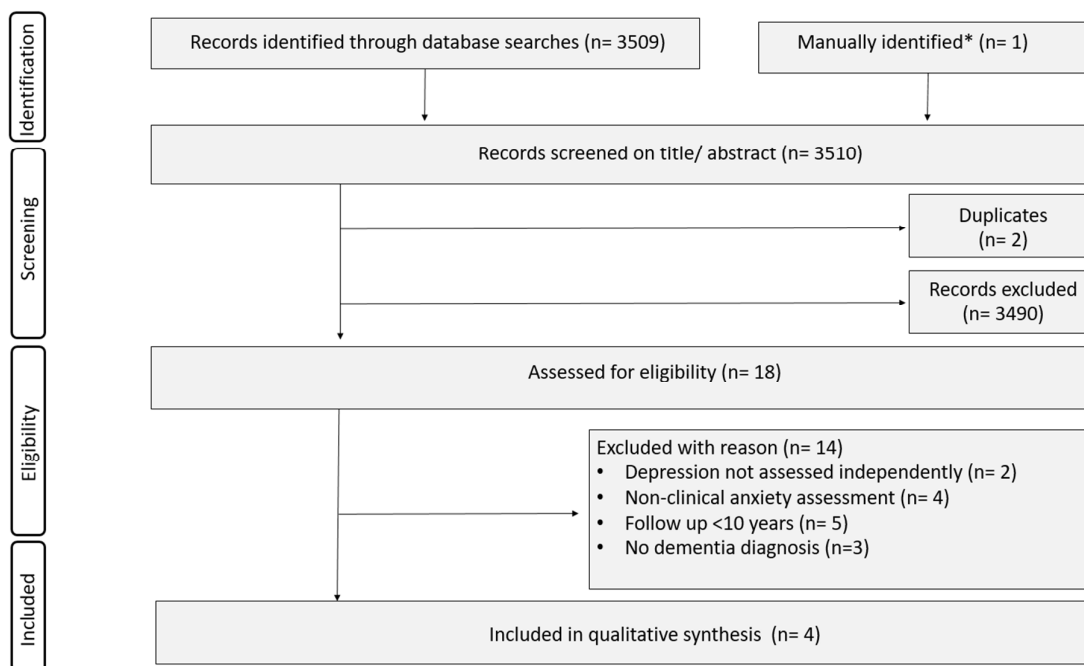

27 **Figure 1** Flowchart of the search and study selection process; \* = manually identified from Petkus et  
 28 al. (2016)

**Table 1** Study Characteristics

|                                | Study type and setting; location                                                            | Follow-up/ Look back period; years (SD)                        | Mean age years (SD)                       | Female n (%) | Education level; no. (%)              | Drop-out rate/Non-response rate % | Baseline cognition measure                            | Anxiety measure; cut-off                                                                                                      | Baseline anxiety, %            | Controls for depression; baseline depression measure | Dementia diagnosis; criteria (no. cases); OR/HR (95% CI)                                                      |
|--------------------------------|---------------------------------------------------------------------------------------------|----------------------------------------------------------------|-------------------------------------------|--------------|---------------------------------------|-----------------------------------|-------------------------------------------------------|-------------------------------------------------------------------------------------------------------------------------------|--------------------------------|------------------------------------------------------|---------------------------------------------------------------------------------------------------------------|
| Boot et al. 2013 (n=441)       | Population based matched case-controlled, Mayo Clinic Rochester, Minnesota, USA             | Lifelong diagnoses documented by medical record                | 72.5 (7.3) – DLB cases age at diagnosis   | 103 (23.1)   | >9 yrs education; (95)                | NR                                | NR                                                    | Clinical diagnosis, present in medical history section of medical record                                                      | 23, 27% cases; 14, 5% controls | Yes; clinical diagnosis from medical history record  | DLB diagnosis by behavioural neurologist; published criteria by McKeith et al (2005) (n=147); OR 7.4 (3.5-16) |
| Gallacher et al. 2009 (n=1160) | Prospective, community based cohort; Caerphilly, Wales, UK                                  | Mean follow up period; 17.3 (1.3)                              | 56.1 (4.4) – mean age at inclusion        | 0            | no qualifications; 601 (55)           | 20                                | NR; dementia unlikely at inclusion (mean age <60 yrs) | STAI; score of ≥35                                                                                                            | 585, 50%                       | Yes; GHQ-30                                          | Dementia diagnosis; DSM-IV or medical records (n=90); OR 1.62 (0.59-4.41)                                     |
| Petkus et al. 2016 (n=1082)    | Prospective, community based cohort; Swedish twins drawn from Swedish Twin Registry, Sweden | Follow up period; 28 (0)                                       | 60.86 (11.15) – mean age at inclusion     | 612 (56.6)   | Beyond elementary education; 423 (39) | 29.8                              | MMSE                                                  | State anxiety subscale of STPI; STPI > 1 SD Q1-Q4 (assessments over 4 time-points)                                            | 403, 37%                       | Yes; OARS depression subscale, CES-D                 | Dementia diagnosis; DSM-III or DMS-IV (n=172); HR 1.48 (1.01-2.18)                                            |
| Zilkens et al. 2014 (n=27136)  | Population based matched case-controlled, Western Australia                                 | Mean look back period; cases 20.4 (10.4), controls 20.0 (10.3) | 78.7 (4.7) – mean age at final time point | 15359 (56.6) | NR                                    | 6.17 (excluded individuals)       | NR                                                    | Clinical diagnosis using ICD-10 AM (Australian Modification) codes documented in health records; meeting diagnostic threshold | 379, 2.8% cases                | Yes; clinical diagnosis by GP                        | Dementia diagnosis; ICD-10 (n=13568); OR 1.61 (1.28-2.02) (>10 years look back period)                        |

(CES-D = Centre of Epidemiological Studies depression subscale, DLB = Dementia with Lewy bodies, GHQ-30 = 30-item general health questionnaire, NR = not recorded; OARS = older American resources and services; STAI = State trait anxiety inventory; STPI = State trait personality inventory)

**Table 2** Case controlled studies: Newcastle-Ottawa scale for assessment of quality of included case controlled studies (+ / - represents whether individual criterion within the subsection was fulfilled)

|                                                                     | Acceptable Criteria                                                                 | Zilkens et al. 2014                                                                                                                                                                                       |          | Boot et al. 2013                                                                                                                                                                                                                                       |          |
|---------------------------------------------------------------------|-------------------------------------------------------------------------------------|-----------------------------------------------------------------------------------------------------------------------------------------------------------------------------------------------------------|----------|--------------------------------------------------------------------------------------------------------------------------------------------------------------------------------------------------------------------------------------------------------|----------|
| <b>Selection</b>                                                    |                                                                                     |                                                                                                                                                                                                           |          |                                                                                                                                                                                                                                                        |          |
| Case definition                                                     | With independent validation                                                         | Record linkage from Western Australian Data Linkage System and Death Registry, no independent validation                                                                                                  | -        | Assessment for DLB using behavioural neurologist                                                                                                                                                                                                       | +        |
| Representativeness of cases                                         | Consecutive or representative series of cases                                       | All dementia cases in period 2000-2009 identified via read-code; lower limit index dementia age 65 years, upper limit 84 years; dementia in other diseases excluded                                       | +        | Recruited from longitudinal studies in period 1984-2013 (Alzheimer Disease Patient Registry, Alzheimer Disease Research Centre Study, and Mayo Clinic Study of Ageing); community dwelling persons aged 70-89 years; excluded structural brain lesions | +        |
| Selection of controls                                               | Community controls                                                                  | Population controls; randomly selected from electoral role aged ≥65 years prior to extraction of health data for controls                                                                                 | +        | Community controls from longitudinal study of ageing; individuals aged ≥65 years; selected if seen by physician in same month as clinical subject diagnosed; matched by age and sex                                                                    | +        |
| Definition of controls                                              | No history of disease                                                               | Excluded if dementia read-code in records; no independent screening                                                                                                                                       | +        | Excluded if diagnosed with DLB/AD during the study, previous stroke, head injury, neurologic disease or movement disorder; extensive cognitive and medical examination                                                                                 | +        |
| <b>Comparability</b>                                                |                                                                                     |                                                                                                                                                                                                           |          |                                                                                                                                                                                                                                                        |          |
| Comparability of cases and controls on basis of design and analysis | Study controls for the most important factor (+/-), and any additional factor (+/-) | Controls for age, sex, vascular risk factors (diabetes, IHD, AF, CVD, hypertension, hyperlipidaemia, heart failure and past or current smoking), head injury, alcohol dependence syndrome, and depression | +        | Controls for age, sex; multivariate analyses control for family history, depression, APOE ε4 alleles, education level, head injury, cancer, and vascular risk factors (stroke, diabetes, alcohol, smoking)                                             | +        |
| <b>Exposure</b>                                                     |                                                                                     |                                                                                                                                                                                                           |          |                                                                                                                                                                                                                                                        |          |
| Ascertainment of exposure                                           | Secure record, structured interview by healthcare practitioner                      | Secure administrative health record, read-codes for mid-life factors documented between aged 30-65 years within years 1966-2009                                                                           | +        | Anxiety history from medical history section of medical record                                                                                                                                                                                         | +        |
| Same method of ascertainment for cases and controls                 | Yes                                                                                 | Yes; review of risk factor read-codes                                                                                                                                                                     | +        | Yes; review of medical history                                                                                                                                                                                                                         | +        |
| Non-response rate                                                   | Similar for both cases and controls                                                 | NR                                                                                                                                                                                                        | -        | NR                                                                                                                                                                                                                                                     | -        |
| <b>Total Score</b>                                                  |                                                                                     |                                                                                                                                                                                                           | <b>7</b> |                                                                                                                                                                                                                                                        | <b>8</b> |

(DLB = Dementia with Lewy bodies; NR = not recorded)

**Table 3** Cohort studies: Newcastle-Ottawa scale for assessment of quality of included cohort studies  
(+ / - represents whether individual criterion within the subsection was fulfilled)

|                                                                          | Acceptable Criteria                                                                 | Petkus et al. 2016                                                                                                                                                                                                      |          | Gallacher et al. 2009                                                                                                                                                                                                                         |          |
|--------------------------------------------------------------------------|-------------------------------------------------------------------------------------|-------------------------------------------------------------------------------------------------------------------------------------------------------------------------------------------------------------------------|----------|-----------------------------------------------------------------------------------------------------------------------------------------------------------------------------------------------------------------------------------------------|----------|
| <b>Selection</b>                                                         |                                                                                     |                                                                                                                                                                                                                         |          |                                                                                                                                                                                                                                               |          |
| Representativeness of exposed cohort                                     | Representative of average adult in the community (age/sex)                          | Population based Swedish twin registry, subsample of twins aged ≥ 50 years                                                                                                                                              | +        | Men only, representative of male inhabitants of Caerphilly region                                                                                                                                                                             | -        |
| Selection of non-exposed cohort                                          | Drawn from same community as exposed cohort                                         | Drawn from same community as exposed cohort                                                                                                                                                                             | +        | Drawn from same community as exposed cohort                                                                                                                                                                                                   | +        |
| Ascertainment of exposure                                                | Secured records, clinical diagnosis using diagnostic tools (ICD-10/DSM-V)           | State anxiety subscale of the State-Trait Personality Inventory (STPI), containing a subset of items from the STAI                                                                                                      | +        | Structured interview using STAI                                                                                                                                                                                                               | +        |
| Demonstration that outcome of interest was not present at start of study | Assessment for dementia at initial enrolment                                        | No baseline screening, exclusion if previous dementia diagnosis, age at inclusion (mean age 60.86 years) makes cognitive impairment unlikely                                                                            | -        | Age at inclusion (mean age 56.1 years) makes cognitive impairment unlikely                                                                                                                                                                    | -        |
| <b>Comparability</b>                                                     |                                                                                     |                                                                                                                                                                                                                         |          |                                                                                                                                                                                                                                               |          |
| Comparability of cohorts on basis of design or analysis                  | Study controls for the most important factor (+), and for any additional factor (+) | Multivariate models control for depression symptoms, baseline age, sex, education, physical illness                                                                                                                     | +        | Study controls for age, social class, marital status, vascular risk factors (alcohol consumption, BP, BMI, total cholesterol, previous vascular disease), educational ability (National Adult Reading Test), and depression symptoms (GHQ-30) | +        |
| <b>Exposure</b>                                                          |                                                                                     |                                                                                                                                                                                                                         |          |                                                                                                                                                                                                                                               |          |
| Assessment of outcome                                                    | Independent blind assessment, record linkage                                        | Screening for dementia using MMSE, cognitive in-person testing (assessing a range of cognitive domains), DSM-III or IV, and record linkage using National Patient Registry and National Patient Cause of Death Registry | +        | Cognitive function assessed using CAMDEX, FAB, CDR; diagnosis made using DSM-IV, screening of primary care and hospital records                                                                                                               | +        |
| Follow up adequate for outcome to occur                                  | Follow up >10 years                                                                 | 28 years                                                                                                                                                                                                                | +        | >20 years                                                                                                                                                                                                                                     | +        |
| Adequacy of follow up of cohorts                                         | Complete follow up, or subjects lost to follow-up unlikely to introduce bias        | NR                                                                                                                                                                                                                      | -        | 20% lost to follow up                                                                                                                                                                                                                         | +        |
| <b>Total Score</b>                                                       |                                                                                     |                                                                                                                                                                                                                         | <b>7</b> |                                                                                                                                                                                                                                               | <b>7</b> |

(BMI = body mass index; BP = blood pressure; CAMDEX = Cambridge mental disorders of the elderly examination; CDR = clinical dementia rating; DSM III/IV/V = Diagnostic and statistical manual of mental disorders III/IV/V; FAB = frontal assessment battery; GHQ-30 = 30-item general health questionnaire; ICD-10 = International classification of diseases 10; MMSE = mini mental state examination; NR = not recorded; STAI = State trait anxiety inventory)

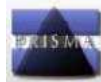

# PRISMA 2009 Checklist

| Section/topic                      | #  | Checklist item                                                                                                                                                                                                                                                                                              | Reported on page # |
|------------------------------------|----|-------------------------------------------------------------------------------------------------------------------------------------------------------------------------------------------------------------------------------------------------------------------------------------------------------------|--------------------|
| <b>TITLE</b>                       |    |                                                                                                                                                                                                                                                                                                             |                    |
| Title                              | 1  | Identify the report as a systematic review, meta-analysis, or both.                                                                                                                                                                                                                                         | 2                  |
| <b>ABSTRACT</b>                    |    |                                                                                                                                                                                                                                                                                                             |                    |
| Structured summary                 | 2  | Provide a structured summary including, as applicable: background; objectives; data sources; study eligibility criteria, participants, and interventions; study appraisal and synthesis methods; results; limitations; conclusions and implications of key findings; systematic review registration number. | 2                  |
| <b>INTRODUCTION</b>                |    |                                                                                                                                                                                                                                                                                                             |                    |
| Rationale                          | 3  | Describe the rationale for the review in the context of what is already known.                                                                                                                                                                                                                              | 4,5                |
| Objectives                         | 4  | Provide an explicit statement of questions being addressed with reference to participants, interventions, comparisons, outcomes, and study design (PICOS).                                                                                                                                                  | 5                  |
| <b>METHODS</b>                     |    |                                                                                                                                                                                                                                                                                                             |                    |
| Protocol and registration          | 5  | Indicate if a review protocol exists, if and where it can be accessed (e.g., Web address), and, if available, provide registration information including registration number.                                                                                                                               | 5                  |
| Eligibility criteria               | 6  | Specify study characteristics (e.g., PICOS, length of follow-up) and report characteristics (e.g., years considered, language, publication status) used as criteria for eligibility, giving rationale.                                                                                                      | 6                  |
| Information sources                | 7  | Describe all information sources (e.g., databases with dates of coverage, contact with study authors to identify additional studies) in the search and date last searched.                                                                                                                                  | 5                  |
| Search                             | 8  | Present full electronic search strategy for at least one database, including any limits used, such that it could be repeated.                                                                                                                                                                               | 6                  |
| Study selection                    | 9  | State the process for selecting studies (i.e., screening, eligibility, included in systematic review, and, if applicable, included in the meta-analysis).                                                                                                                                                   | 6                  |
| Data collection process            | 10 | Describe method of data extraction from reports (e.g., piloted forms, independently, in duplicate) and any processes for obtaining and confirming data from investigators.                                                                                                                                  | 6,7                |
| Data items                         | 11 | List and define all variables for which data were sought (e.g., PICOS, funding sources) and any assumptions and simplifications made.                                                                                                                                                                       | 7                  |
| Risk of bias in individual studies | 12 | Describe methods used for assessing risk of bias of individual studies (including specification of whether this was done at the study or outcome level), and how this information is to be used in any data synthesis.                                                                                      | 10                 |
| Summary measures                   | 13 | State the principal summary measures (e.g., risk ratio, difference in means).                                                                                                                                                                                                                               | 2, 9               |
| Synthesis of results               | 14 | Describe the methods of handling data and combining results of studies, if done, including measures of consistency (e.g., $I^2$ ) for each meta-analysis.                                                                                                                                                   |                    |

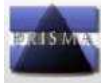

# PRISMA 2009 Checklist

Page 1 of 2

| Section/topic                 | #  | Checklist item                                                                                                                                                                                           | Reported on page # |
|-------------------------------|----|----------------------------------------------------------------------------------------------------------------------------------------------------------------------------------------------------------|--------------------|
| Risk of bias across studies   | 15 | Specify any assessment of risk of bias that may affect the cumulative evidence (e.g., publication bias, selective reporting within studies).                                                             | 9                  |
| Additional analyses           | 16 | Describe methods of additional analyses (e.g., sensitivity or subgroup analyses, meta-regression), if done, indicating which were pre-specified.                                                         |                    |
| <b>RESULTS</b>                |    |                                                                                                                                                                                                          |                    |
| Study selection               | 17 | Give numbers of studies screened, assessed for eligibility, and included in the review, with reasons for exclusions at each stage, ideally with a flow diagram.                                          | 7,17               |
| Study characteristics         | 18 | For each study, present characteristics for which data were extracted (e.g., study size, PICOS, follow-up period) and provide the citations.                                                             | 6,7                |
| Risk of bias within studies   | 19 | Present data on risk of bias of each study and, if available, any outcome level assessment (see item 12).                                                                                                | 10,19,20           |
| Results of individual studies | 20 | For all outcomes considered (benefits or harms), present, for each study: (a) simple summary data for each intervention group (b) effect estimates and confidence intervals, ideally with a forest plot. |                    |
| Synthesis of results          | 21 | Present results of each meta-analysis done, including confidence intervals and measures of consistency.                                                                                                  |                    |
| Risk of bias across studies   | 22 | Present results of any assessment of risk of bias across studies (see Item 15).                                                                                                                          | 10,19,20           |
| Additional analysis           | 23 | Give results of additional analyses, if done (e.g., sensitivity or subgroup analyses, meta-regression [see Item 16]).                                                                                    |                    |
| <b>DISCUSSION</b>             |    |                                                                                                                                                                                                          |                    |
| Summary of evidence           | 24 | Summarize the main findings including the strength of evidence for each main outcome; consider their relevance to key groups (e.g., healthcare providers, users, and policy makers).                     | 8,9                |
| Limitations                   | 25 | Discuss limitations at study and outcome level (e.g., risk of bias), and at review-level (e.g., incomplete retrieval of identified research, reporting bias).                                            | 12,13              |
| Conclusions                   | 26 | Provide a general interpretation of the results in the context of other evidence, and implications for future research.                                                                                  | 11,12,13           |
| <b>FUNDING</b>                |    |                                                                                                                                                                                                          |                    |
| Funding                       | 27 | Describe sources of funding for the systematic review and other support (e.g., supply of data); role of funders for the systematic review.                                                               | 14                 |

From: Moher D, Liberati A, Tetzlaff J, Altman DG, The PRISMA Group (2009). Preferred Reporting Items for Systematic Reviews and Meta-Analyses: The PRISMA Statement. PLoS Med 6(6): e1000097. doi:10.1371/journal.pmed1000097

For more information, visit: [www.prisma-statement.org](http://www.prisma-statement.org).

Page 2 of 2

For peer review only - <http://bmjopen.bmj.com/site/about/guidelines.xhtml>



# BMJ Open

## Support for mid-life anxiety diagnosis as an independent risk factor for dementia: a systematic review.

|                                 |                                                                                                                                                                                                                                                                                                                                              |
|---------------------------------|----------------------------------------------------------------------------------------------------------------------------------------------------------------------------------------------------------------------------------------------------------------------------------------------------------------------------------------------|
| Journal:                        | <i>BMJ Open</i>                                                                                                                                                                                                                                                                                                                              |
| Manuscript ID                   | bmjopen-2017-019399.R1                                                                                                                                                                                                                                                                                                                       |
| Article Type:                   | Research                                                                                                                                                                                                                                                                                                                                     |
| Date Submitted by the Author:   | 14-Nov-2017                                                                                                                                                                                                                                                                                                                                  |
| Complete List of Authors:       | Gimson, Amy; University of Southampton Faculty of Health Sciences, Medicine<br>Schlosser, Marco; University College London Division of Psychiatry<br>Huntley, Jonathan; Institute of Psychiatry, Old Age Psychiatry; University College London Division of Psychiatry<br>Marchant, Natalie; University College London Division of Psychiatry |
| <b>Primary Subject Heading</b>: | Mental health                                                                                                                                                                                                                                                                                                                                |
| Secondary Subject Heading:      | Geriatric medicine, Neurology                                                                                                                                                                                                                                                                                                                |
| Keywords:                       | Dementia < NEUROLOGY, Anxiety disorders < PSYCHIATRY, EPIDEMIOLOGY                                                                                                                                                                                                                                                                           |
|                                 |                                                                                                                                                                                                                                                                                                                                              |

SCHOLARONE™  
Manuscripts

1  
2  
3 **Support for mid-life anxiety diagnosis as an independent risk factor for**  
4 **dementia: a systematic review.**  
5  
6  
7

8 Authors: Amy Gimson<sup>1</sup>, Marco Schlosser<sup>2</sup>, Jonathan D. Huntley<sup>2,3</sup>, Natalie L. Marchant<sup>2</sup>  
9

10  
11 Institution:

12 <sup>1</sup> University of Southampton, Faculty of Medicine, Southampton, UK

13 <sup>2</sup> University College London, Division of Psychiatry, London, UK

14 <sup>3</sup> Kings College London, Institute of Psychiatry, London, UK  
15  
16  
17

18 Correspondence to: Natalie L Marchant, n.marchant@ucl.ac.uk  
19  
20  
21  
22  
23  
24  
25  
26  
27  
28  
29  
30  
31  
32  
33  
34  
35  
36  
37  
38  
39  
40  
41  
42  
43  
44  
45  
46  
47  
48  
49  
50  
51  
52  
53  
54  
55  
56  
57  
58  
59  
60

## Abstract

**Objectives:** Anxiety is an increasingly recognised predictor of cognitive deterioration in older adults and those with mild cognitive impairment (MCI). Often believed to be a prodromal feature of neurodegenerative disease, anxiety may also be an independent risk factor for dementia, operationally defined here as preceding dementia diagnosis by >10 years.

**Design:** A systematic review of the literature on anxiety diagnosis and long-term risk for dementia was performed following published guidelines.

**Setting and participants:** MEDLINE, PSYCINFO, and EMBASE were searched for peer-reviewed journals up until 8 March 2017. Publications reporting hazard/odds ratios for all-cause dementia based on clinical criteria from prospective cohort or case-control studies were selected. Included studies measured clinically significant anxiety in isolation or after controlling for symptoms of depression, and reported a mean interval between anxiety assessment and dementia diagnosis of at least 10 years. Methodological quality assessments were performed using the Newcastle-Ottawa scale.

**Outcome measure:** HR/ORs for all cause dementia.

**Results** Searches yielded 3510 articles, of which four (0.02%) were eligible. The studies had a combined sample size of 29,819, and all studies found a positive association between clinically significant anxiety and future dementia. Due to the heterogeneity between studies, a meta-analysis was not conducted.

**Conclusions** Clinically significant anxiety in mid-life was associated with an increased risk of dementia over an interval of at least 10 years. These findings indicate that anxiety may be a risk factor for late-life dementia, excluding anxiety that is related to prodromal cognitive decline. With increasing focus on identifying modifiable risk factors for dementia, more high

1  
2  
3 quality prospective studies are required to clarify whether clinical anxiety is a risk factor for  
4  
5 dementia, separate from a prodromal symptom.  
6  
7

### 8 **Strengths and limitations of this study:**

9

- 10  
11 • This systematic review used a rigorous methodology, with broad search terms and  
12 precisely pre-defined inclusion and exclusion criteria to investigate a life-course  
13 association between a potentially modifiable risk factor, anxiety, and dementia,  
14 whilst excluding anxiety related to pre-clinical dementia.  
15  
16
- 17 • Strict exclusion criteria were used to remove studies that did not either discuss  
18 anxiety diagnosis alone or control for depression, to account for high levels of  
19 anxiety-depression comorbidity  
20  
21
- 22 • Study quality was formally investigated using the Newcastle-Ottawa scale  
23  
24
- 25 • The review was limited by the lack of assessment of cognition at baseline in  
26 retrospective studies, however, the length of look-back minimises the likelihood of  
27 cognitive impairment at baseline  
28  
29
- 30 • The small number and heterogeneity of study designs rendered a meta-analysis  
31 inappropriate, therefore formal statistical analyses could not be performed  
32  
33  
34  
35  
36  
37  
38  
39  
40  
41  
42  
43

### 44 **Introduction**

45

46 Dementia, and more specifically Alzheimer's disease (AD), is a progressive neurocognitive  
47 disease. In the absence of any disease modifying treatments, there is increasing focus on  
48 primary prevention to reduce risk of its development, and on early intervention to  
49 potentially slow progression. A better understanding of risk factors for dementia is  
50 therefore vital for improving therapeutic interventions. Alongside a number of well  
51  
52  
53  
54  
55  
56  
57  
58  
59  
60

1  
2  
3 described cardiovascular risk factors [1], increasing evidence has highlighted the association  
4  
5 between psychiatric illnesses and the development of late-onset dementia [2]. Further work  
6  
7 is needed to understand whether these psychiatric symptoms and illnesses represent  
8  
9 prodromal symptoms or act as independent risk factors.  
10

11  
12 Depression has been consistently related to the development of dementia [3]. Three meta-  
13  
14 analyses have reported that a diagnosis of depression is associated with up to a twofold  
15  
16 increase in risk [3–5]. Ownby and colleagues further report that a longer interval between  
17  
18 diagnosis of depression and diagnosis of dementia is significantly associated with an  
19  
20 increased odds ratio (OR) of developing dementia [3]. This substantiates interpretations of  
21  
22 depression as a risk factor for developing dementia, whereas a stronger association over  
23  
24 shorter intervals would have been more indicative of prodromal symptoms. Conversely, a  
25  
26 recent study found no association between dementia and depressive symptoms  
27  
28 experienced more than 22 years before dementia diagnosis, however a positive association  
29  
30 between dementia and depressive symptoms experienced on average 11 years prior to  
31  
32 diagnosis of dementia was reported [6].  
33  
34  
35  
36  
37

38 Although anxiety is a prevalent psychiatric disorder [7], and commonly co-occurs with  
39  
40 depression, the impact of anxiety on risk for cognitive decline and dementia has been far  
41  
42 less studied. Anxiety symptoms are commonly experienced in the years preceding a  
43  
44 dementia diagnosis [8], and have been associated with cognitive decline and the  
45  
46 progression from MCI to AD [9–11]. A recent review reported that anxiety and  
47  
48 neuropsychiatric symptoms not reaching clinically diagnostic levels were associated with  
49  
50 increased risk of dementia [12]. The authors indicated that anxiety was likely a prodromal  
51  
52 symptom of dementia in these community samples. This may well have been the case,  
53  
54  
55  
56  
57  
58  
59  
60

1  
2  
3 particularly given the relatively short intervals between assessment of anxiety symptoms  
4  
5 and assessment of dementia, however, this does not preclude anxiety also being a risk  
6  
7 factor.  
8  
9

10 The association between anxiety symptoms (independent of the dementia-prodrome) and  
11  
12 dementia in later life could more easily be investigated with longer intervals between  
13  
14 anxiety assessment and dementia diagnosis, as the studies that have investigated this  
15  
16 association within a 5-10 year interval have reported variable results [13,14]. The average  
17  
18 length of prodromal preclinical cognitive decline has been proposed to be between 5-6  
19  
20 years [15], and individuals diagnosed with MCI may progress to AD within 5 years [16].  
21  
22 Therefore, examining studies with at least a 10-year interval between anxiety assessment  
23  
24 and dementia diagnosis would increase likelihood that anxiety is independent from the  
25  
26 dementia prodrome.  
27  
28  
29

30  
31 It is possible that anxiety symptoms meeting diagnostic threshold will have a stronger  
32  
33 association with dementia than general symptoms because this has been shown with  
34  
35 depression [4]. To date, there has been no systematic review to investigate the association  
36  
37 between clinically significant anxiety and dementia. The aim of this study was therefore to  
38  
39 review the literature examining the association between clinically significant levels of  
40  
41 anxiety and dementia risk over a longer timescale (>10 years).  
42  
43  
44

## 45 **Methods**

46  
47  
48 This systematic review followed the Preferred Reporting Items for Systematic Reviews and  
49  
50 Meta-analyses (PRISMA) and Centre for Reviews and Dissemination (CRD) guidance for  
51  
52 undertaking reviews in health care [17].  
53  
54  
55  
56  
57  
58  
59  
60

### *Search strategy*

A systematic literature search of MEDLINE, PSYCINFO and EMBASE databases was conducted of articles published from inception up until 8<sup>th</sup> March 2017 to identify articles reporting analyses of the association between anxiety (as defined by clinical diagnosis or self-report scales with a clinically significant threshold) and dementia or MCI incidence. Search terms used consisted of: (dement\* OR Alzheimer\* OR “mild cognitive impairment” OR MCI) AND (anx\* OR “generalised anxiety disorder” OR GAD) AND (risk\* OR odds), as presented in online supplementary table ST1. We aimed to identify articles discussing (1) diagnosis of any type of dementia, (2) anxiety diagnosis, and (3) risk of dementia. The search was restricted to human studies and those published in English. Reference lists were searched for additional relevant articles. Searches were conducted by a single reviewer (AG). An independent review of all screened articles was conducted by a second reviewer (MS). Any disagreement was resolved by consensus with a third reviewer (NM), which occurred in two cases.

### *Selection Criteria and Article Screening*

Inclusion criteria were 1) a diagnosis of anxiety or an assessment of anxiety symptoms meeting diagnostic criteria using a standardised assessment tool, excluding populations with post-traumatic stress disorder (PTSD) or obsessive-compulsive disorder (OCD); 2) population-based studies where anxiety is assessed at least – on average – 10 years preceding final clinical assessment for dementia in line with previous meta-analyses on depression using intervals of at least 10 years [3]; 3) a diagnosis of dementia using validated criteria (e.g. Diagnostic Statistical Manual III-IV (DSM III-IV), International Classification of Diseases 10 (ICD-10)); 4) late-onset dementia diagnoses (aged  $\geq 65$  years). Eligible articles were identified by performing an initial screen of titles and abstracts, followed by a full

1  
2  
3 article review of those that passed screening. All retrospective and prospective studies that  
4  
5 met these criteria were selected.  
6

### 7 8 *Data extraction* 9

10 Outcome measures related to anxiety and dementia diagnosis were independently  
11  
12 extracted by two authors (AG, MS). Disagreements were resolved through discussion. Study  
13  
14 design, sample characteristics (including educational level and age), follow-up length,  
15  
16 dropout rate, anxiety (including measure and baseline score where appropriate), criteria for  
17  
18 assessing dementia, and measurements of depression as a confounder (including measure  
19  
20 and baseline score), were recorded. In cases of insufficient data, authors were contacted by  
21  
22 email.  
23  
24  
25

26  
27 INSERT FIGURE 1  
28

### 29 30 *Study Quality* 31

32 Two authors (AG, MS) independently assessed study quality and risk of bias using the  
33  
34 Newcastle-Ottawa scale, which contains separate quality assessment instruments for case-  
35  
36 control and cohort studies.  
37  
38

## 39 40 **Results**

### 41 42 *Literature Search* 43

44 The literature search detected 3509 citations, of which two were duplicates. One further  
45  
46 paper was identified manually during reference screening. After screening titles and  
47  
48 abstracts, 18 full-text articles were assessed for eligibility. Fourteen articles were excluded  
49  
50 based on criteria described earlier (Figure 1), four studies were included in the final review  
51  
52 [18–21].  
53  
54  
55  
56  
57  
58  
59  
60



### *Study Characteristics*

Characteristics of the four selected studies are shown in Table 1. Clinically significant anxiety was documented based on clinical diagnosis using International Classification of Diseases 10 (ICD-10) criteria (n = 2), the State Trait Anxiety Inventory (STAI, n = 1) and a subscale of the State Trait Personality Inventory (STPI, n = 1).

Gallacher et al. (2009) measured anxiety using the STAI, which has a range from 20 to 80 [22], and is a validated measure for assessing anxiety symptoms. A clinically significant cut-off of 39-40 has been proposed [23,24]. Gallacher et al. (2009) categorised 'high anxiety' as having a STAI score between 35 and 72, compared to a 'low anxiety' group who had a STAI score between 20 and 34. Boot et al. (2013) and Zilkens et al. (2014) used ICD-10 criteria to diagnose an anxiety disorder.

Petkus et al. (2016) assessed anxiety using state anxiety subscale of the State-Trait Personality Inventory (STPI), which contains a subset of items from the STAI. Participants scoring at least one standard deviation above the population mean, equating to a score of  $\geq 25$  out of 40, were categorised having 'high anxiety'. Although there is no established cut-off for clinically significant anxiety using this scale, scores greater than 1 SD above the population mean are likely to represent a group with a high anxiety symptom burden. After discussion amongst the reviewers (AG, MS, NLM), we reached a consensus judgement that the study was suitable for inclusion in this review.

Dementia diagnosis was in most cases assessed using DSM III-IV (n = 2) or ICD-10 criteria (n = 1), although the study by Boot et al. (2013) assessed Dementia with Lewy Bodies (DLB) by clinical diagnosis using published criteria [25].

1  
2  
3 Sample sizes of the studies ranged from 441 to 27 136 participants, recruited from both or  
4  
5 either community and hospital inpatient/outpatient populations. Gallacher et al. (2009) and  
6  
7 Petkus et al. (2016) conducted prospective cohort studies using a community twin-  
8  
9 population that excluded dementia at baseline. Zilkens et al. (2014), and Boot et al. (2013)  
10  
11 conducted matched case-control studies, which retrospectively analysed community and  
12  
13 hospital records of individuals with dementia or case-matched controls for anxiety diagnosis  
14  
15 and therefore did not include a cognitive assessment at baseline to exclude dementia.  
16  
17 Zilkens et al. (2014) drew controls from the electoral roll, whereas Boot et al. (2013) drew  
18  
19 them from the community-dwelling persons included in the Mayo Clinic Study of Aging. The  
20  
21 proportion of females in each study ranged from 0 to 56.6%. Educational level was recorded  
22  
23 for all but one study; which ranged from 55% with no qualifications to 95% with >9 years of  
24  
25 education.  
26  
27  
28  
29  
30

31 INSERT TABLE 1  
32  
33

### 34 *Anxiety diagnosis association with dementia* 35

36 All studies included in this review found a significant increase in the number of dementia  
37  
38 diagnoses in patients who had a clinical anxiety diagnosis or experienced clinically significant  
39  
40 anxiety symptoms on average at least 10 years prior to their diagnosis of dementia; Zilkens  
41  
42 et al. (2014): OR = 1.61 (95% CI 1.28-2.02), Boot et al. (2013): OR = 7.4 (95% CI 3.5-16),  
43  
44 Gallacher et al. (2009): OR = 1.62 (95% CI 0.59-4.41) and Petkus et al. (2016): OR = 1.48 (95%  
45  
46 CI 1.01-2.18), respectively [18–21]. On the whole, retrospective studies that looked back for  
47  
48 life-long diagnoses of anxiety found a stronger association between mid-life anxiety and  
49  
50 later dementia diagnosis, than prospective studies investigating an association over a  
51  
52 shorter time period. Additionally, Petkus et al. (2016) demonstrated that the association  
53  
54  
55  
56  
57  
58  
59  
60

1  
2  
3 between high anxiety and dementia diagnosis remained when they excluded participants  
4  
5 who developed dementia within 5 years of the baseline assessment. This subsample had an  
6  
7 average interval between baseline and dementia diagnosis of 14.7 years (SD 6.7 years). Both  
8  
9 lend support that the associations found were independent of prodromal dementia  
10  
11  
12 symptoms.

13  
14  
15 Each study controlled for a range of demographic factors, with all controlling for vascular  
16  
17 and other psychiatric risk factors (Table 2 and 3). All studies assessed and controlled for  
18  
19 depression symptoms in their analysis. Boot et al. (2013) found a stronger association  
20  
21 between anxiety diagnosis alone with future dementia than either depression diagnosis  
22  
23 alone or mixed anxiety and depression diagnosis, although the number of individuals with  
24  
25 anxiety was markedly larger than those in the other two categories (anxiety alone n=168;  
26  
27 depression alone n=52; anxiety and depression n=56). Although Zilkens et al. (2014)  
28  
29 assessed a range of psychiatric diagnoses including anxiety and depression, they did not  
30  
31 assess their interaction. Petkus et al. (2016) and Gallacher et al. (2009), whilst controlling for  
32  
33 depression, made no assessment of the comparative strength of relationship or their  
34  
35 interaction.  
36  
37  
38  
39

#### 40 *Study Quality Rating*

41  
42  
43 All studies included were rated highly on the Newcastle-Ottawa scale [26]. From a maximum  
44  
45 score of 9, Boot et al (2013) was rated 8; and Zilkens et al. (2014), Petkus et al. (2016) and  
46  
47 Gallacher et al. (2009) were each rated 7. These studies were of similar quality to those  
48  
49 included in a recent meta-analysis examining dementia risk estimates associated with late-  
50  
51 life depression [4].  
52  
53  
54  
55  
56  
57  
58  
59  
60

1  
2  
3 Three of the studies had representative samples of community populations; the fourth led  
4  
5 by Gallacher et al. (2009) included only men. All controlled for a range of both demographic,  
6  
7 physical and psychological health factors. All outcomes were assessed either via secure  
8  
9 health records, or independent validation. Gallacher et al. (2009) experienced 20% loss to  
10  
11 follow-up, which compares favourably to the pre-mentioned Cherbain et al. (2015) review,  
12  
13 which considered studies with an attrition rate of between 4.3% and 55.46%, and a review  
14  
15 of MCI drug studies with attrition rates varying from 12% to 49% [27]. Petkus et al. (2016)  
16  
17 did not clearly report loss to follow-up. For both case-control studies, the primary care  
18  
19 records did not include a cognitive assessment at baseline. Therefore, pre-existing cognitive  
20  
21 impairment before diagnosis cannot be ruled out, although long look-back periods make this  
22  
23 less likely.  
24  
25  
26  
27

28  
29 INSERT TABLE 2

30  
31 INSERT TABLE 3

## 32 33 34 **Discussion**

35  
36 This systematic review found four high quality studies that all showed a positive association  
37  
38 between clinically significant anxiety and risk of late-onset dementia over a mean interval of  
39  
40 at least 10 years from anxiety assessment to dementia diagnosis, even after accounting for  
41  
42 potential confounders. This important finding provides further evidence that a common  
43  
44 mental health condition in mid-life is associated with later life neurodegenerative disorders.  
45  
46

47  
48 Anxiety symptomatology has previously been related to dementia risk and cognitive decline,  
49  
50 although not conclusively [10,28]. A recent systematic review reported a positive  
51  
52 association between anxiety symptoms and dementia diagnosis over a short time interval  
53  
54 [12]. In that review the majority of studies reported follow up periods between 2-3.8 years.  
55  
56  
57  
58  
59  
60

1  
2  
3 A single study had a follow up time of up to 11.8 years, however the average interval  
4  
5 between anxiety and dementia diagnosis may have been less than 10 years, therefore it was  
6  
7 not included in the current review [13]. Gulpers et al. found stronger associations with  
8  
9 smaller intervals between assessment of anxiety and dementia diagnosis. As a result, the  
10  
11 authors concluded that anxiety may result from a prodromal state of dementia, where an  
12  
13 increase in anxiety may be due to an individual's insight into their early, subjective  
14  
15 experience of cognitive decline [12]. Given the short time interval between assessments,  
16  
17 Gulpers et al. were unable to determine whether anxiety could also serve as an independent  
18  
19 risk for dementia. This review reports solely articles that were not included Gulpers et al.'s  
20  
21 analyses, and therefore furthers their work by providing an independent assessment of the  
22  
23 anxiety-dementia association. Effect sizes of the studies included in this review (1.48 - 7.4)  
24  
25 were comparable to the overall effect size found by Gulpers et al. (2016) of 1.61, suggesting  
26  
27 that the association between clinically significant mid-life anxiety and later-life dementia is  
28  
29 as strong as that between late-life anxiety symptoms and dementia.  
30  
31  
32  
33

34  
35 The prodromal phase of dementia can begin several years before objective dementia is  
36  
37 manifest. In the present review, we sought to minimise the potential influence of pre-  
38  
39 clinical cognitive decline by including only studies that assessed anxiety and dementia  
40  
41 diagnoses over an extended period. Three studies (Zilkens et al. 2014; Gallacher et al. 2009;  
42  
43 Petkus et al. 2016) demonstrated a mean interval of at least 10 years between the anxiety  
44  
45 and dementia evaluations. Boot et al. (2013) analysed participant's lifelong medical record,  
46  
47 however, the mean interval between anxiety and dementia diagnosis was not reported.  
48  
49

50  
51 Findings from this review corroborate recent evidence that anxiety symptoms or diagnosis  
52  
53 are associated with risk of MCI [29,30]. These findings further complement the association  
54  
55  
56  
57  
58  
59  
60

1  
2  
3 between depression and dementia diagnosis [4], which is particularly relevant due to high  
4  
5 levels of anxiety-depression comorbidity. Moreover, they lend support for the proposal that  
6  
7 multiple psychiatric risk factors are implicated together as a latent risk factor for dementia  
8  
9  
10 [2].

11  
12 It has recently been suggested that a longer interval period between anxiety and dementia  
13  
14 diagnosis may provide evidence for a common biological pathway linking anxiety,  
15  
16 depression, and dementia [20]. An abnormal stress response, such as exhibited in anxiety  
17  
18 disorders, may be associated with accelerated cellular ageing and neuro-progression (a  
19  
20 pathological reorganisation of the central nervous system) resulting in increased  
21  
22 neurodegeneration, neuronal apoptosis and lowered neuroplasticity [31]. Although  
23  
24 glucocorticoid, inflammatory mediator and vascular disease mechanisms are hypothesised  
25  
26 [3,32], as yet, no convincing candidate biological mechanism linking anxiety and cognitive  
27  
28 impairment exists.  
29  
30  
31

32  
33  
34 The results of this review should be interpreted in the light of their limitations. Only studies  
35  
36 that had been published and written in English were included, which may limit extrapolation  
37  
38 across broader populations. Retrospective studies did not examine baseline cognition and  
39  
40 therefore cannot exclude early cognitive decline at the time of anxiety assessment,  
41  
42 however, the length of look-back, ranging from over 10 years to the first entry of an  
43  
44 individual's medical record, minimises the likelihood of cognitive impairment at baseline. To  
45  
46 account for high levels of anxiety-depression comorbidity, this review included only papers  
47  
48 discussing anxiety diagnosis alone, or those that controlled for depression symptomatology.  
49  
50  
51 However, the Zilkens et al. (2014) and Boot et al. (2013) cannot completely exclude overlap  
52  
53  
54 of these two commonly comorbid illnesses because their occurrence was ascertained from  
55  
56  
57  
58  
59  
60

1  
2  
3 lists of diagnoses in medical records. The use of read codes in retrospective studies may  
4  
5 have resulted in lower identification of individuals with clinically significant anxiety as a  
6  
7 result of inconsistent entry of read codes during evaluations, or of absence of clinical record  
8  
9 for non-help seekers [33]. Publication bias may also have influenced the studies included, as  
10  
11 positive findings may be more likely to have been published than studies finding no  
12  
13 association. Furthermore, results must be interpreted in the light of proposals that the  
14  
15 prodromal AD pathophysiologic processes may develop beyond 10 years before the onset of  
16  
17 clinical symptoms [34].

18  
19  
20  
21  
22 Whether reducing anxiety in middle-age would result in reduced risk of dementia remains  
23  
24 an open question. The effect of treatment of anxiety using pharmacologic and non-  
25  
26 pharmacologic therapies during midlife on later risk for dementia has not yet been  
27  
28 investigated. Benzodiazepines, commonly used in the treatment of anxiety, have been  
29  
30 shown to increase risk of mortality in some groups [35]. It is possible that diverse non-  
31  
32 pharmacological therapies, including talking therapies [36] and mindfulness-based  
33  
34 interventions and meditation practices [37], that are known to reduce anxiety in midlife,  
35  
36 could have a risk-reducing effect, although this is yet to be thoroughly researched.  
37  
38

39  
40  
41 Given the high prevalence of anxiety seen in primary care, we suggest that general  
42  
43 practitioners could consider anxiety alongside depression as an indicator of risk factor for  
44  
45 dementia. To improve the rate of earlier diagnosis of dementia, close monitoring of subtle  
46  
47 cognitive decline in older adults with a history of anxiety, depression and cerebrovascular  
48  
49 disease would be encouraged. This review expands our understanding of anxiety as a  
50  
51 potentially modifiable risk for dementia. Given the limited number of studies investigating  
52  
53 the anxiety-dementia relationship, further research is required to assess underlying  
54  
55  
56  
57  
58  
59  
60

1  
2  
3 mechanisms that link these disorders, and to disambiguate anxiety's potential role as a risk  
4  
5 factor as separate from a prodromal symptom of dementia.  
6  
7

## 8 **Acknowledgements**

9  
10  
11 This work was supported by a grant from the British Geriatrics Society. We would like to  
12  
13 thank Dr Bradley Boeve (Mayo Clinic College of Medicine, Rochester), Dr Claire Burton  
14  
15 (Keele University), and Dr Andrew Petkus (University of Southern California) for providing  
16  
17 clarification of articles screened for inclusion in support of this work. NLM was supported by  
18  
19 University College London and Alzheimer's Society (AS-SF-15b-002). JDH was funded by an  
20  
21 MRC research training fellowship (G0901982).  
22  
23  
24

## 25 **Contributors**

26  
27  
28 AG contributed to design of the study, data screening and extraction, drafting of the  
29  
30 manuscript and submission. MS contributed to literature search, data screening and  
31  
32 extraction, and manuscript preparation. JDH contributed to the study design, provided  
33  
34 methodological expertise and editing of the manuscript. NLM contributed to the  
35  
36 conception and study design, data interpretation, and editing of the manuscript.  
37  
38  
39

## 40 **Competing interests**

41  
42  
43 None of the contributing authors have any conflicting interests to declare.  
44  
45  
46

## 47 **Data sharing statement**

48  
49  
50 No additional data are available.  
51  
52  
53

## 54 **References**

55  
56 [1] Fillit H, Nash D, Rundek T, Zuckerman A. Cardiovascular risk factors and dementia.  
57  
58  
59



- 1  
2  
3 Am J Geriatr Pharmacother 2008;6:100–18.  
4  
5 [2] Marchant NL, Howard RJ. Cognitive debt and Alzheimer's disease. *J Alzheimers Dis*  
6 2015;44:755–70.  
7  
8 [3] Ownby R, Crocco E, Acevedo A, John V, Loewenstein D. Depression and Risk for  
9 Alzheimer Disease: a systematic review, meta-analysis and metaregression analysis.  
10 *Arch Gen Psychiatry* 2006;63:530.  
11  
12 [4] Cherbuin N, Kim S, Anstey KJ. Dementia risk estimates associated with measures of  
13 depression: a systematic review and meta-analysis. *BMJ Open* 2015;5:e008853.  
14  
15 [5] Diniz BS, Butters MA, Albert SM, Dew MA, Reynolds CF, Byers A, et al. Late-life  
16 depression and risk of vascular dementia and Alzheimer's disease: systematic review  
17 and meta-analysis of community-based cohort studies. *Br J Psychiatry* 2013;202:329–  
18 35.  
19  
20 [6] Singh-Manoux A, Dugravot A, Fournier A, Abell J, Ebmeier K, Kivimäki M, et al.  
21 Trajectories of Depressive Symptoms Before Diagnosis of Dementia. *JAMA*  
22 *Psychiatry* 2017;74:712.  
23  
24 [7] Bandelow B, Michaelis S. Epidemiology of anxiety disorders in the 21st century.  
25 *Dialogues Clin Neurosci* 2015;17:327–35.  
26  
27 [8] Gallagher D, Coen R, Kilroy D, Belinski K, Bruce I, Coakley D, et al. Anxiety and  
28 behavioural disturbance as markers of prodromal Alzheimer's disease in patients with  
29 mild cognitive impairment. *Int J Geriatr Psychiatry* 2011;26:166–72.  
30  
31 [9] Palmer K, Berger AK, Monastero R, Winblad B, Backman L, Fratiglioni L. Predictors  
32 of progression from mild cognitive impairment to Alzheimer disease. *Neurology*  
33 2007;68:1596–602.  
34  
35 [10] Yochim BP, Mueller AE, Segal DL. Late life anxiety is associated with decreased  
36 memory and executive functioning in community dwelling older adults. *J Anxiety*  
37 *Disord* 2013;27:567–75.  
38  
39 [11] Beaudreau SA, O'Hara R. Late-life anxiety and cognitive impairment: a review. *Am J*  
40 *Geriatr Psychiatry* 2008;16:790–803.  
41  
42 [12] Gulpers B, Ramakers I, Hamel R, Kohler S, Voshaar R, Verhey F. Anxiety as a  
43 Predictor for Cognitive Decline and Dementia: A Systematic Review and Meta-  
44 analysis. *Am J Geriatr Psychiatry* 2016.  
45  
46 [13] de Bruijn RFAG, Direk N, Mirza SS, Hofman A, Koudstaal PJ, Tiemeier H, et al.  
47 Anxiety is not associated with the risk of dementia or cognitive decline: the Rotterdam  
48 Study. *Am J Geriatr Psychiatry* 2014;22:1382–90.  
49  
50 [14] Burton C, Campbell P, Jordan K, Strauss V, Mallen C. The association of anxiety and  
51 depression with future dementia diagnosis: A case-control study in primary care. *Fam*  
52 *Pract* 2013;30:25–30.  
53  
54 [15] Wilson RS, Leurgans SE, Boyle PA, Bennett DA. Cognitive decline in prodromal  
55 Alzheimer disease and mild cognitive impairment. *Arch Neurol* 2011;68:351–6.  
56  
57 [16] Gauthier S, Reisberg B, Zaudig M, Petersen RC, Ritchie K, Broich K, et al. Mild

- cognitive impairment. *Lancet* 2006;367:1262–70.
- [17] Centre for Reviews and Dissemination. CRD's Guidance for undertaking reviews in health care. 2009.
- [18] Zilkens RR, Bruce DG, Duke J, Spilisbury K, Semmens JB. Severe psychiatric disorders in mid-life and risk of dementia in late-life (age 65-84 years): A population based case-control study. *Curr Alzheimer Res* 2014;11:681–93.
- [19] Boot BP, Orr CF, Ahlskog JE, Ferman TJ, Roberts R, Pankratz VS, et al. Risk factors for dementia with Lewy bodies: a case-control study. *Neurology* 2013;81:833–40.
- [20] Gallacher J, Bayer A, Fish M, Pickering J, Pedro S, Dunstan F, et al. Does anxiety affect risk of dementia? Findings from the Caerphilly Prospective Study. *Psychosom Med* 2009;71:659–66.
- [21] Petkus AJ, Reynolds CA, Wetherell JL, Kremen WS, Pedersen NL, Gatz M, et al. Anxiety is associated with increased risk of dementia in older Swedish twins. *Alzheimer's Dement* 2016;12:399–406.
- [22] Spielberger C. *Manual for the State-Trait Anxiety Inventory*. 1983.
- [23] Julian LJ. *Measures of anxiety: State-Trait Anxiety Inventory (STAI), Beck Anxiety Inventory (BAI), and Hospital Anxiety and Depression Scale-Anxiety (HADS-A)*. *Arthritis Care Res (Hoboken)* 2011:S467-72.
- [24] Knight RG, Waal-Manning HJ, Spears GF. Some norms and reliability data for the State-Trait Anxiety Inventory and the Zung Self-Rating Depression scale. *Br J Clin Psychol* 1983;22:245–9.
- [25] McKeith IG, Dickson DW, Lowe J, Emre M, O'Brien JT, Feldman H, et al. Diagnosis and management of dementia with Lewy bodies: Third report of the DLB consortium. *Neurology* 2005;65:1863–72.
- [26] Wells G, Shea B, O'Connell D, Peterson J, Welch V, Losos M, et al. The Newcastle-Ottawa Scale (NOS) for assessing the quality if nonrandomized studies in meta-analyses. (Available from URL [http://www.ohri.ca/programs/clinical\\_epidemiology/oxford.asp](http://www.ohri.ca/programs/clinical_epidemiology/oxford.asp)) 2012:2012.
- [27] Jelic V, Kivipelto M, Winblad B. Clinical trials in mild cognitive impairment: lessons for the future. *J Neurol Neurosurg Psychiatry* 2006;77:429–38.
- [28] Bierman EJM, Comijs HC, Rijmen F, Jonker C, Beekman ATF. Anxiety symptoms and cognitive performance in later life: results from the longitudinal aging study Amsterdam. *Aging Ment Health* 2008;12:517–23.
- [29] Jacob L, Bohlken J, Kostev K. Risk Factors for Mild Cognitive Impairment in German Primary Care Practices. *J Alzheimer's Dis* 2017;56:379–84.
- [30] Kassem AM, Ganguli M, Yaffe K, Hanlon JT, Lopez OL, Wilson JW, et al. Anxiety symptoms and risk of dementia and mild cognitive impairment in the oldest old women. *Aging Ment Health* 2017:1–9.
- [31] Perna G, Iannone G, Alciati A, Caldirola D. Are Anxiety Disorders Associated with Accelerated Aging? A Focus on Neuroprogression. *Neural Plast* 2016;2016:1–19.

- 1  
2  
3 [32] Sapolsky RM. Glucocorticoids and hippocampal atrophy in neuropsychiatric disorders.  
4 Arch Gen Psychiatry 2000;57:925–35.  
5  
6 [33] Davé S, Petersen I. Creating medical and drug code lists to identify cases in primary  
7 care databases. Pharmacoepidemiol Drug Saf 2009;18:704–7.  
8  
9 [34] Pietrzak RH, Lim YY, Neumeister A, Ames D, Ellis KA, Harrington K, et al. Amyloid- $\beta$ ,  
10 anxiety, and cognitive decline in preclinical Alzheimer disease: a multicenter,  
11 prospective cohort study. JAMA Psychiatry 2015;72:284–91.  
12  
13 [35] Fontanella CA, Campo J V., Phillips GS, Hiance-Steelesmith DL, Sweeney HA, Tam  
14 K, et al. Benzodiazepine Use and Risk of Mortality Among Patients With  
15 Schizophrenia. J Clin Psychiatry 2016;77:661–7.  
16  
17 [36] Orgeta V, Qazi A, Spector AE, Orrell M. Psychological treatments for depression and  
18 anxiety in dementia and mild cognitive impairment. In: Orgeta V, editor. Cochrane  
19 Database Syst. Rev., Chichester, UK: John Wiley & Sons, Ltd; 2014.  
20  
21 [37] Khoury B, Lecomte T, Fortin G, Masse M, Therien P, Bouchard V, et al. Mindfulness-  
22 based therapy: A comprehensive meta-analysis. Clin Psychol Rev 2013;33:763–71.  
23  
24  
25  
26  
27  
28  
29  
30  
31  
32  
33  
34  
35  
36  
37  
38  
39  
40  
41  
42  
43  
44  
45  
46  
47  
48  
49  
50  
51  
52  
53  
54  
55  
56  
57  
58  
59  
60

**Figure 1** Flowchart of the search and study selection process; \* = manually identified from Petkus et al. (2016)

**Table 1** Study Characteristics

|                                | Study type and setting; location                                                            | Follow-up/ Look back period; years (SD)                        | Mean age years (SD)                       | Female n (%) | Education level; no. (%)              | Drop-out rate/Non-response rate % | Baseline cognition measure                            | Anxiety measure; cut-off                                                                                                      | Baseline anxiety, %            | Controls for depression; baseline depression measure | Dementia diagnosis; criteria (no. cases); OR/HR (95% CI)                                                      |
|--------------------------------|---------------------------------------------------------------------------------------------|----------------------------------------------------------------|-------------------------------------------|--------------|---------------------------------------|-----------------------------------|-------------------------------------------------------|-------------------------------------------------------------------------------------------------------------------------------|--------------------------------|------------------------------------------------------|---------------------------------------------------------------------------------------------------------------|
| Boot et al. 2013 (n=441)       | Population based matched case-controlled, Mayo Clinic Rochester, Minnesota, USA             | Lifelong diagnoses documented by medical record                | 72.5 (7.3) – DLB cases age at diagnosis   | 103 (23.1)   | >9 yrs education; (95)                | NR                                | NR                                                    | Clinical diagnosis, present in medical history section of medical record                                                      | 23, 27% cases; 14, 5% controls | Yes; clinical diagnosis from medical history record  | DLB diagnosis by behavioural neurologist; published criteria by McKeith et al (2005) (n=147); OR 7.4 (3.5-16) |
| Gallacher et al. 2009 (n=1160) | Prospective, community based cohort; Caerphilly, Wales, UK                                  | Mean follow up period; 17.3 (1.3)                              | 56.1 (4.4) – mean age at inclusion        | 0            | no qualifications; 601 (55)           | 20                                | NR; dementia unlikely at inclusion (mean age <60 yrs) | STAI; score of ≥35                                                                                                            | 585, 50%                       | Yes; GHQ-30                                          | Dementia diagnosis; DSM-IV or medical records (n=90); OR 1.62 (0.59-4.41)                                     |
| Petkus et al. 2016 (n=1082)    | Prospective, community based cohort; Swedish twins drawn from Swedish Twin Registry, Sweden | Follow up period; 28 (0)                                       | 60.86 (11.15) – mean age at inclusion     | 612 (56.6)   | Beyond elementary education; 423 (39) | 29.8                              | MMSE                                                  | State anxiety subscale of STPI; STPI > 1 SD Q1-Q4 (assessments over 4 time-points)                                            | 403, 37%                       | Yes; OARS depression subscale, CES-D                 | Dementia diagnosis; DSM-III or DMS-IV (n=172); HR 1.48 (1.01-2.18)                                            |
| Zilkens et al. 2014 (n=27136)  | Population based matched case-controlled, Western Australia                                 | Mean look back period; cases 20.4 (10.4), controls 20.0 (10.3) | 78.7 (4.7) – mean age at final time point | 15359 (56.6) | NR                                    | 6.17 (excluded individuals)       | NR                                                    | Clinical diagnosis using ICD-10 AM (Australian Modification) codes documented in health records; meeting diagnostic threshold | 379, 2.8% cases                | Yes; clinical diagnosis by GP                        | Dementia diagnosis; ICD-10 (n=13568); OR 1.61 (1.28-2.02) (>10 years look back period)                        |

(CES-D = Centre of Epidemiological Studies depression subscale, DLB = Dementia with Lewy bodies, GHQ-30 = 30-item general health questionnaire, NR = not recorded; OARS = older American resources and services; STAI = State trait anxiety inventory; STPI = State trait personality inventory)

**Table 2** Case controlled studies: Newcastle-Ottawa scale for assessment of quality of included case controlled studies (+ / - represents whether individual criterion within the subsection was fulfilled)

|                                                                     | Acceptable Criteria                                                                 | Zilkens et al. 2014                                                                                                                                                                                       |          | Boot et al. 2013                                                                                                                                                                                                                                       |          |
|---------------------------------------------------------------------|-------------------------------------------------------------------------------------|-----------------------------------------------------------------------------------------------------------------------------------------------------------------------------------------------------------|----------|--------------------------------------------------------------------------------------------------------------------------------------------------------------------------------------------------------------------------------------------------------|----------|
| <b>Selection</b>                                                    |                                                                                     |                                                                                                                                                                                                           |          |                                                                                                                                                                                                                                                        |          |
| Case definition                                                     | With independent validation                                                         | Record linkage from Western Australian Data Linkage System and Death Registry, no independent validation                                                                                                  | -        | Assessment for DLB using behavioural neurologist                                                                                                                                                                                                       | +        |
| Representativeness of cases                                         | Consecutive or representative series of cases                                       | All dementia cases in period 2000-2009 identified via read-code; lower limit index dementia age 65 years, upper limit 84 years; dementia in other diseases excluded                                       | +        | Recruited from longitudinal studies in period 1984-2013 (Alzheimer Disease Patient Registry, Alzheimer Disease Research Centre Study, and Mayo Clinic Study of Ageing); community dwelling persons aged 70-89 years; excluded structural brain lesions | +        |
| Selection of controls                                               | Community controls                                                                  | Population controls; randomly selected from electoral role aged ≥65 years prior to extraction of health data for controls                                                                                 | +        | Community controls from longitudinal study of ageing; individuals aged ≥65 years; selected if seen by physician in same month as clinical subject diagnosed; matched by age and sex                                                                    | +        |
| Definition of controls                                              | No history of disease                                                               | Excluded if dementia read-code in records; no independent screening                                                                                                                                       | +        | Excluded if diagnosed with DLB/AD during the study, previous stroke, head injury, neurologic disease or movement disorder; extensive cognitive and medical examination                                                                                 | +        |
| <b>Comparability</b>                                                |                                                                                     |                                                                                                                                                                                                           |          |                                                                                                                                                                                                                                                        |          |
| Comparability of cases and controls on basis of design and analysis | Study controls for the most important factor (+/-), and any additional factor (+/-) | Controls for age, sex, vascular risk factors (diabetes, IHD, AF, CVD, hypertension, hyperlipidaemia, heart failure and past or current smoking), head injury, alcohol dependence syndrome, and depression | +        | Controls for age, sex; multivariate analyses control for family history, depression, APOE ε4 alleles, education level, head injury, cancer, and vascular risk factors (stroke, diabetes, alcohol, smoking)                                             | +        |
| <b>Exposure</b>                                                     |                                                                                     |                                                                                                                                                                                                           |          |                                                                                                                                                                                                                                                        |          |
| Ascertainment of exposure                                           | Secure record, structured interview by healthcare practitioner                      | Secure administrative health record, read-codes for mid-life factors documented between aged 30-65 years within years 1966-2009                                                                           | +        | Anxiety history from medical history section of medical record                                                                                                                                                                                         | +        |
| Same method of ascertainment for cases and controls                 | Yes                                                                                 | Yes; review of risk factor read-codes                                                                                                                                                                     | +        | Yes; review of medical history                                                                                                                                                                                                                         | +        |
| Non-response rate                                                   | Similar for both cases and controls                                                 | NR                                                                                                                                                                                                        | -        | NR                                                                                                                                                                                                                                                     | -        |
| <b>Total Score</b>                                                  |                                                                                     |                                                                                                                                                                                                           | <b>7</b> |                                                                                                                                                                                                                                                        | <b>8</b> |

(DLB = Dementia with Lewy bodies; NR = not recorded)

**Table 3** Cohort studies: Newcastle-Ottawa scale for assessment of quality of included cohort studies  
(+ / - represents whether individual criterion within the subsection was fulfilled)

|                                                                          | Acceptable Criteria                                                                 | Petkus et al. 2016                                                                                                                                                                                                      |          | Gallacher et al. 2009                                                                                                                                                                                                                         |          |
|--------------------------------------------------------------------------|-------------------------------------------------------------------------------------|-------------------------------------------------------------------------------------------------------------------------------------------------------------------------------------------------------------------------|----------|-----------------------------------------------------------------------------------------------------------------------------------------------------------------------------------------------------------------------------------------------|----------|
| <b>Selection</b>                                                         |                                                                                     |                                                                                                                                                                                                                         |          |                                                                                                                                                                                                                                               |          |
| Representativeness of exposed cohort                                     | Representative of average adult in the community (age/sex)                          | Population based Swedish twin registry, subsample of twins aged ≥ 50 years                                                                                                                                              | +        | Men only, representative of male inhabitants of Caerphilly region                                                                                                                                                                             | -        |
| Selection of non-exposed cohort                                          | Drawn from same community as exposed cohort                                         | Drawn from same community as exposed cohort                                                                                                                                                                             | +        | Drawn from same community as exposed cohort                                                                                                                                                                                                   | +        |
| Ascertainment of exposure                                                | Secured records, clinical diagnosis using diagnostic tools (ICD-10/DSM-V)           | State anxiety subscale of the State-Trait Personality Inventory (STPI), containing a subset of items from the STAI                                                                                                      | +        | Structured interview using STAI                                                                                                                                                                                                               | +        |
| Demonstration that outcome of interest was not present at start of study | Assessment for dementia at initial enrolment                                        | No baseline screening, exclusion if previous dementia diagnosis, age at inclusion (mean age 60.86 years) makes cognitive impairment unlikely                                                                            | -        | Age at inclusion (mean age 56.1 years) makes cognitive impairment unlikely                                                                                                                                                                    | -        |
| <b>Comparability</b>                                                     |                                                                                     |                                                                                                                                                                                                                         |          |                                                                                                                                                                                                                                               |          |
| Comparability of cohorts on basis of design or analysis                  | Study controls for the most important factor (+), and for any additional factor (+) | Multivariate models control for depression symptoms, baseline age, sex, education, physical illness                                                                                                                     | +        | Study controls for age, social class, marital status, vascular risk factors (alcohol consumption, BP, BMI, total cholesterol, previous vascular disease), educational ability (National Adult Reading Test), and depression symptoms (GHQ-30) | +        |
| <b>Exposure</b>                                                          |                                                                                     |                                                                                                                                                                                                                         |          |                                                                                                                                                                                                                                               |          |
| Assessment of outcome                                                    | Independent blind assessment, record linkage                                        | Screening for dementia using MMSE, cognitive in-person testing (assessing a range of cognitive domains), DSM-III or IV, and record linkage using National Patient Registry and National Patient Cause of Death Registry | +        | Cognitive function assessed using CAMDEX, FAB, CDR; diagnosis made using DSM-IV, screening of primary care and hospital records                                                                                                               | +        |
| Follow up adequate for outcome to occur                                  | Follow up >10 years                                                                 | 28 years                                                                                                                                                                                                                | +        | >20 years                                                                                                                                                                                                                                     | +        |
| Adequacy of follow up of cohorts                                         | Complete follow up, or subjects lost to follow-up unlikely to introduce bias        | NR                                                                                                                                                                                                                      | -        | 20% lost to follow up                                                                                                                                                                                                                         | +        |
| <b>Total Score</b>                                                       |                                                                                     |                                                                                                                                                                                                                         | <b>7</b> |                                                                                                                                                                                                                                               | <b>7</b> |

(BMI = body mass index; BP = blood pressure; CAMDEX = Cambridge mental disorders of the elderly examination; CDR = clinical dementia rating; DSM III/IV/V = Diagnostic and statistical manual of mental disorders III/IV/V; FAB = frontal assessment battery; GHQ-30 = 30-item general health questionnaire; ICD-10 = International classification of diseases 10; MMSE = mini mental state examination; NR = not recorded; STAI = State trait anxiety inventory)

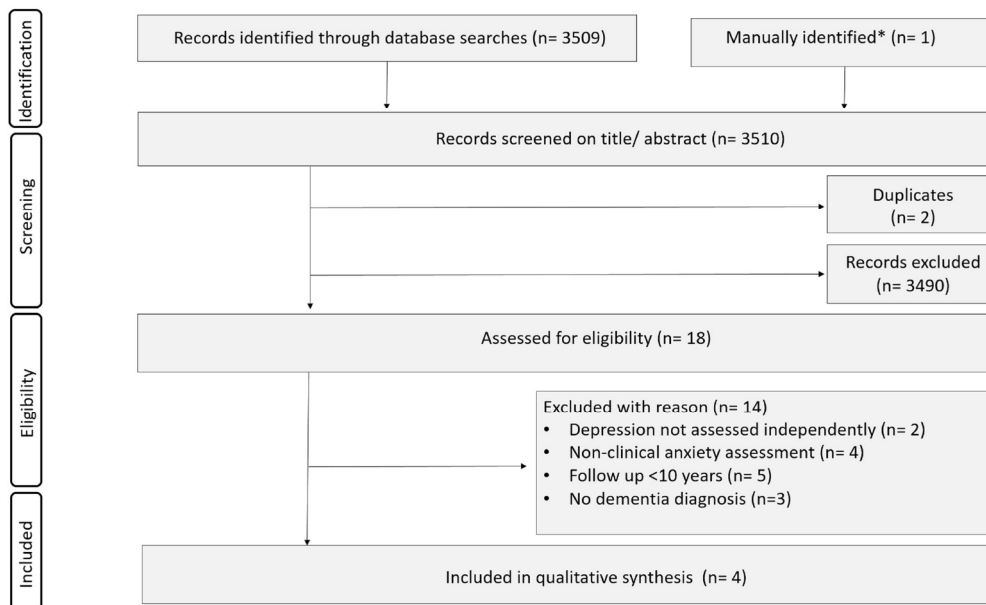

Figure 1 Flowchart of the search and study selection process; \* = manually identified from Petkus et al. (2016)

175x106mm (300 x 300 DPI)

## Example Search Strategy

Search carried out in Ovid MEDLINE(R) from 1946 to October Week 3 2017

| #  | Searches                                                                                                                                 | Results |
|----|------------------------------------------------------------------------------------------------------------------------------------------|---------|
| 1  | dement*.mp. [mp=ti, ot, ab, tx, kw, ct, sh, nm, hw, kf, px, rx, an, ui, eu, pm, sy, tc, id, tm, tn, dm, mf, dv, fs]                      | 101878  |
| 2  | limit 1 to (english language and humans)                                                                                                 | 84635   |
| 3  | alzheimer*.mp. [mp=ti, ot, ab, tx, kw, ct, sh, nm, hw, kf, px, rx, an, ui, eu, pm, sy, tc, id, tm, tn, dm, mf, dv, fs]                   | 123908  |
| 4  | limit 3 to (english language and humans)                                                                                                 | 98174   |
| 5  | mild cognitive impairment.mp. [mp=ti, ot, ab, tx, kw, ct, sh, nm, hw, kf, px, rx, an, ui, eu, pm, sy, tc, id, tm, tn, dm, mf, dv, fs]    | 10469   |
| 6  | limit 5 to (english language and humans)                                                                                                 | 9789    |
| 7  | MCI.mp. [mp=ti, ot, ab, tx, kw, ct, sh, nm, hw, kf, px, rx, an, ui, eu, pm, sy, tc, id, tm, tn, dm, mf, dv, fs]                          | 12968   |
| 8  | limit 7 to (english language and humans)                                                                                                 | 10517   |
| 9  | 2 OR 4 OR 6 OR 8                                                                                                                         | 155363  |
| 10 | anx*.mp. [mp=ti, ot, ab, tx, kw, ct, sh, nm, hw, kf, px, rx, an, ui, eu, pm, sy, tc, id, tm, tn, dm, mf, dv, fs]                         | 196896  |
| 11 | limit 10 to (english language and humans)                                                                                                | 154215  |
| 12 | generalised anxiety disorder.mp. [mp=ti, ot, ab, tx, kw, ct, sh, nm, hw, kf, px, rx, an, ui, eu, pm, sy, tc, id, tm, tn, dm, mf, dv, fs] | 475     |
| 13 | limit 12 to (english language and humans)                                                                                                | 438     |
| 14 | GAD.mp. [mp=ti, ot, ab, tx, kw, ct, sh, nm, hw, kf, px, rx, an, ui, eu, pm, sy, tc, id, tm, tn, dm, mf, dv, fs]                          | 7550    |
| 15 | limit 14 to (english language and humans)                                                                                                | 4299    |
| 16 | 11 OR 13 OR 15                                                                                                                           | 156261  |
| 17 | risk*.mp. [mp=ti, ot, ab, tx, kw, ct, sh, nm, hw, kf, px, rx, an, ui, eu, pm, sy, tc, id, tm, tn, dm, mf, dv, fs]                        | 2086806 |
| 18 | limit 17 to (english language and humans)                                                                                                | 1757965 |
| 19 | odds.mp. [mp=ti, ot, ab, tx, kw, ct, sh, nm, hw, kf, px, rx, an, ui, eu, pm, sy, tc, id, tm, tn, dm, mf, dv, fs]                         | 268449  |
| 20 | limit 19 to (english language and humans)                                                                                                | 257505  |
| 21 | 18 OR 20                                                                                                                                 | 1849508 |
| 22 | 9 AND 16 AND 21                                                                                                                          | 776     |





# PRISMA 2009 Checklist

| Section/topic                      | #  | Checklist item                                                                                                                                                                                                                                                                                              | Reported on page # |
|------------------------------------|----|-------------------------------------------------------------------------------------------------------------------------------------------------------------------------------------------------------------------------------------------------------------------------------------------------------------|--------------------|
| <b>TITLE</b>                       |    |                                                                                                                                                                                                                                                                                                             |                    |
| Title                              | 1  | Identify the report as a systematic review, meta-analysis, or both.                                                                                                                                                                                                                                         | 2                  |
| <b>ABSTRACT</b>                    |    |                                                                                                                                                                                                                                                                                                             |                    |
| Structured summary                 | 2  | Provide a structured summary including, as applicable: background; objectives; data sources; study eligibility criteria, participants, and interventions; study appraisal and synthesis methods; results; limitations; conclusions and implications of key findings; systematic review registration number. | 2                  |
| <b>INTRODUCTION</b>                |    |                                                                                                                                                                                                                                                                                                             |                    |
| Rationale                          | 3  | Describe the rationale for the review in the context of what is already known.                                                                                                                                                                                                                              | 4,5                |
| Objectives                         | 4  | Provide an explicit statement of questions being addressed with reference to participants, interventions, comparisons, outcomes, and study design (PICOS).                                                                                                                                                  | 5                  |
| <b>METHODS</b>                     |    |                                                                                                                                                                                                                                                                                                             |                    |
| Protocol and registration          | 5  | Indicate if a review protocol exists, if and where it can be accessed (e.g., Web address), and, if available, provide registration information including registration number.                                                                                                                               | 5                  |
| Eligibility criteria               | 6  | Specify study characteristics (e.g., PICOS, length of follow-up) and report characteristics (e.g., years considered, language, publication status) used as criteria for eligibility, giving rationale.                                                                                                      | 6                  |
| Information sources                | 7  | Describe all information sources (e.g., databases with dates of coverage, contact with study authors to identify additional studies) in the search and date last searched.                                                                                                                                  | 5                  |
| Search                             | 8  | Present full electronic search strategy for at least one database, including any limits used, such that it could be repeated.                                                                                                                                                                               | 6                  |
| Study selection                    | 9  | State the process for selecting studies (i.e., screening, eligibility, included in systematic review, and, if applicable, included in the meta-analysis).                                                                                                                                                   | 6                  |
| Data collection process            | 10 | Describe method of data extraction from reports (e.g., piloted forms, independently, in duplicate) and any processes for obtaining and confirming data from investigators.                                                                                                                                  | 6,7                |
| Data items                         | 11 | List and define all variables for which data were sought (e.g., PICOS, funding sources) and any assumptions and simplifications made.                                                                                                                                                                       | 7                  |
| Risk of bias in individual studies | 12 | Describe methods used for assessing risk of bias of individual studies (including specification of whether this was done at the study or outcome level), and how this information is to be used in any data synthesis.                                                                                      | 10                 |
| Summary measures                   | 13 | State the principal summary measures (e.g., risk ratio, difference in means).                                                                                                                                                                                                                               | 2, 9               |
| Synthesis of results               | 14 | Describe the methods of handling data and combining results of studies, if done, including measures of consistency (e.g., $I^2$ ) for each meta-analysis.                                                                                                                                                   |                    |

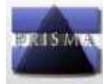

# PRISMA 2009 Checklist

Page 1 of 2

| Section/topic                 | #  | Checklist item                                                                                                                                                                                           | Reported on page # |
|-------------------------------|----|----------------------------------------------------------------------------------------------------------------------------------------------------------------------------------------------------------|--------------------|
| Risk of bias across studies   | 15 | Specify any assessment of risk of bias that may affect the cumulative evidence (e.g., publication bias, selective reporting within studies).                                                             | 9                  |
| Additional analyses           | 16 | Describe methods of additional analyses (e.g., sensitivity or subgroup analyses, meta-regression), if done, indicating which were pre-specified.                                                         |                    |
| <b>RESULTS</b>                |    |                                                                                                                                                                                                          |                    |
| Study selection               | 17 | Give numbers of studies screened, assessed for eligibility, and included in the review, with reasons for exclusions at each stage, ideally with a flow diagram.                                          | 7,17               |
| Study characteristics         | 18 | For each study, present characteristics for which data were extracted (e.g., study size, PICOS, follow-up period) and provide the citations.                                                             | 6,7                |
| Risk of bias within studies   | 19 | Present data on risk of bias of each study and, if available, any outcome level assessment (see item 12).                                                                                                | 10,19,20           |
| Results of individual studies | 20 | For all outcomes considered (benefits or harms), present, for each study: (a) simple summary data for each intervention group (b) effect estimates and confidence intervals, ideally with a forest plot. |                    |
| Synthesis of results          | 21 | Present results of each meta-analysis done, including confidence intervals and measures of consistency.                                                                                                  |                    |
| Risk of bias across studies   | 22 | Present results of any assessment of risk of bias across studies (see Item 15).                                                                                                                          | 10,19,20           |
| Additional analysis           | 23 | Give results of additional analyses, if done (e.g., sensitivity or subgroup analyses, meta-regression [see Item 16]).                                                                                    |                    |
| <b>DISCUSSION</b>             |    |                                                                                                                                                                                                          |                    |
| Summary of evidence           | 24 | Summarize the main findings including the strength of evidence for each main outcome; consider their relevance to key groups (e.g., healthcare providers, users, and policy makers).                     | 8,9                |
| Limitations                   | 25 | Discuss limitations at study and outcome level (e.g., risk of bias), and at review-level (e.g., incomplete retrieval of identified research, reporting bias).                                            | 12,13              |
| Conclusions                   | 26 | Provide a general interpretation of the results in the context of other evidence, and implications for future research.                                                                                  | 11,12,13           |
| <b>FUNDING</b>                |    |                                                                                                                                                                                                          |                    |
| Funding                       | 27 | Describe sources of funding for the systematic review and other support (e.g., supply of data); role of funders for the systematic review.                                                               | 14                 |

From: Moher D, Liberati A, Tetzlaff J, Altman DG, The PRISMA Group (2009). Preferred Reporting Items for Systematic Reviews and Meta-Analyses: The PRISMA Statement. PLoS Med 6(6): e1000097. doi:10.1371/journal.pmed1000097

For more information, visit: [www.prisma-statement.org](http://www.prisma-statement.org).

Page 2 of 2

For peer review only - <http://bmjopen.bmj.com/site/about/guidelines.xhtml>

# BMJ Open

## Support for mid-life anxiety diagnosis as an independent risk factor for dementia: a systematic review.

|                                 |                                                                                                                                                                                                                                                                                                                                              |
|---------------------------------|----------------------------------------------------------------------------------------------------------------------------------------------------------------------------------------------------------------------------------------------------------------------------------------------------------------------------------------------|
| Journal:                        | <i>BMJ Open</i>                                                                                                                                                                                                                                                                                                                              |
| Manuscript ID                   | bmjopen-2017-019399.R2                                                                                                                                                                                                                                                                                                                       |
| Article Type:                   | Research                                                                                                                                                                                                                                                                                                                                     |
| Date Submitted by the Author:   | 19-Jan-2018                                                                                                                                                                                                                                                                                                                                  |
| Complete List of Authors:       | Gimson, Amy; University of Southampton Faculty of Health Sciences, Medicine<br>Schlosser, Marco; University College London Division of Psychiatry<br>Huntley, Jonathan; Institute of Psychiatry, Old Age Psychiatry; University College London Division of Psychiatry<br>Marchant, Natalie; University College London Division of Psychiatry |
| <b>Primary Subject Heading</b>: | Mental health                                                                                                                                                                                                                                                                                                                                |
| Secondary Subject Heading:      | Geriatric medicine, Neurology                                                                                                                                                                                                                                                                                                                |
| Keywords:                       | Dementia < NEUROLOGY, Anxiety disorders < PSYCHIATRY, EPIDEMIOLOGY                                                                                                                                                                                                                                                                           |
|                                 |                                                                                                                                                                                                                                                                                                                                              |

SCHOLARONE™  
Manuscripts

1  
2  
3 **Support for mid-life anxiety diagnosis as an independent risk factor for**  
4 **dementia: a systematic review.**  
5  
6  
7

8 Authors: Amy Gimson<sup>1</sup>, Marco Schlosser<sup>2</sup>, Jonathan D. Huntley<sup>2,3</sup>, Natalie L. Marchant<sup>2</sup>  
9

10  
11 Institution:

12 <sup>1</sup> University of Southampton, Faculty of Medicine, Southampton, UK

13 <sup>2</sup> University College London, Division of Psychiatry, London, UK

14 <sup>3</sup> Kings College London, Institute of Psychiatry, London, UK  
15  
16  
17

18 Correspondence to: Natalie L Marchant, n.marchant@ucl.ac.uk  
19  
20  
21  
22  
23  
24  
25  
26  
27  
28  
29  
30  
31  
32  
33  
34  
35  
36  
37  
38  
39  
40  
41  
42  
43  
44  
45  
46  
47  
48  
49  
50  
51  
52  
53  
54  
55  
56  
57  
58  
59  
60

## Abstract

**Objectives:** Anxiety is an increasingly recognised predictor of cognitive deterioration in older adults and those with mild cognitive impairment (MCI). Often believed to be a prodromal feature of neurodegenerative disease, anxiety may also be an independent risk factor for dementia, operationally defined here as preceding dementia diagnosis by >10 years.

**Design:** A systematic review of the literature on anxiety diagnosis and long-term risk for dementia was performed following published guidelines.

**Setting and participants:** MEDLINE, PSYCINFO, and EMBASE were searched for peer-reviewed journals up until 8 March 2017. Publications reporting hazard/odds ratios for all-cause dementia based on clinical criteria from prospective cohort or case-control studies were selected. Included studies measured clinically significant anxiety in isolation or after controlling for symptoms of depression, and reported a mean interval between anxiety assessment and dementia diagnosis of at least 10 years. Methodological quality assessments were performed using the Newcastle-Ottawa scale.

**Outcome measure:** HR/ORs for all cause dementia.

**Results** Searches yielded 3510 articles, of which four (0.02%) were eligible. The studies had a combined sample size of 29,819, and all studies found a positive association between clinically significant anxiety and future dementia. Due to the heterogeneity between studies, a meta-analysis was not conducted.

**Conclusions** Clinically significant anxiety in mid-life was associated with an increased risk of dementia over an interval of at least 10 years. These findings indicate that anxiety may be a risk factor for late-life dementia, excluding anxiety that is related to prodromal cognitive decline. With increasing focus on identifying modifiable risk factors for dementia, more high

1  
2  
3 quality prospective studies are required to clarify whether clinical anxiety is a risk factor for  
4  
5 dementia, separate from a prodromal symptom.  
6  
7

### 8 **Strengths and limitations of this study:**

9

- 10  
11 • This systematic review used a rigorous methodology, with broad search terms and  
12 precisely pre-defined inclusion and exclusion criteria to investigate a life-course  
13 association between a potentially modifiable risk factor, anxiety, and dementia,  
14 whilst excluding anxiety related to pre-clinical dementia.  
15  
16
- 17 • Strict exclusion criteria were used to remove studies that did not either discuss  
18 anxiety diagnosis alone or control for depression, to account for high levels of  
19 anxiety-depression comorbidity  
20  
21
- 22 • Study quality was formally investigated using the Newcastle-Ottawa scale  
23  
24
- 25 • The review was limited by the lack of assessment of cognition at baseline in  
26 retrospective studies, however, the length of look-back minimises the likelihood of  
27 cognitive impairment at baseline  
28  
29
- 30 • The small number and heterogeneity of study designs rendered a meta-analysis  
31 inappropriate, therefore formal statistical analyses could not be performed  
32  
33  
34  
35  
36  
37  
38  
39  
40  
41  
42  
43

### 44 **Introduction**

45

46 Dementia, and more specifically Alzheimer's disease (AD), is a progressive neurocognitive  
47 disease. In the absence of any disease modifying treatments, there is increasing focus on  
48 primary prevention to reduce risk of its development, and on early intervention to  
49 potentially slow progression. A better understanding of risk factors for dementia is  
50 therefore vital for improving therapeutic interventions. Alongside a number of well  
51  
52  
53  
54  
55  
56  
57  
58  
59  
60

1  
2  
3 described cardiovascular risk factors [1], increasing evidence has highlighted the association  
4  
5 between psychiatric illnesses and the development of late-onset dementia [2]. Further work  
6  
7 is needed to understand whether these psychiatric symptoms and illnesses represent  
8  
9 prodromal symptoms or act as independent risk factors.  
10

11  
12 Depression has been consistently related to the development of dementia [3]. Three meta-  
13  
14 analyses have reported that a diagnosis of depression is associated with up to a twofold  
15  
16 increase in risk [3–5]. Ownby and colleagues further report that a longer interval between  
17  
18 diagnosis of depression and diagnosis of dementia is significantly associated with an  
19  
20 increased odds ratio (OR) of developing dementia [3]. This substantiates interpretations of  
21  
22 depression as a risk factor for developing dementia, whereas a stronger association over  
23  
24 shorter intervals would have been more indicative of prodromal symptoms. Conversely, a  
25  
26 recent study found no association between dementia and depressive symptoms  
27  
28 experienced more than 22 years before dementia diagnosis, however a positive association  
29  
30 between dementia and depressive symptoms experienced on average 11 years prior to  
31  
32 diagnosis of dementia was reported [6].  
33  
34  
35  
36  
37

38 Although anxiety is a prevalent psychiatric disorder [7], and commonly co-occurs with  
39  
40 depression, the impact of anxiety on risk for cognitive decline and dementia has been far  
41  
42 less studied. Anxiety symptoms are commonly experienced in the years preceding a  
43  
44 dementia diagnosis [8], and have been associated with cognitive decline and the  
45  
46 progression from MCI to AD [9–11]. A recent review reported that anxiety and  
47  
48 neuropsychiatric symptoms not reaching clinically diagnostic levels were associated with  
49  
50 increased risk of dementia [12]. The authors indicated that anxiety was likely a prodromal  
51  
52 symptom of dementia in these community samples. This may well have been the case,  
53  
54  
55  
56  
57  
58  
59  
60

1  
2  
3 particularly given the relatively short intervals between assessment of anxiety symptoms  
4  
5 and assessment of dementia, however, this does not preclude anxiety also being a risk  
6  
7 factor.  
8  
9

10 The association between anxiety symptoms (independent of the dementia-prodrome) and  
11  
12 dementia in later life could more easily be investigated with longer intervals between  
13  
14 anxiety assessment and dementia diagnosis, as the studies that have investigated this  
15  
16 association within a 5-10 year interval have reported variable results [13,14]. The average  
17  
18 length of prodromal preclinical cognitive decline has been proposed to be between 5-6  
19  
20 years [15], and individuals diagnosed with MCI may progress to AD within 5 years [16].  
21  
22 Therefore, examining studies with at least a 10-year interval between anxiety assessment  
23  
24 and dementia diagnosis would increase likelihood that anxiety is independent from the  
25  
26 dementia prodrome.  
27  
28  
29

30  
31 It is possible that anxiety symptoms meeting diagnostic threshold will have a stronger  
32  
33 association with dementia than general symptoms because this has been shown with  
34  
35 depression [4]. To date, there has been no systematic review to investigate the association  
36  
37 between clinically significant anxiety and dementia. The aim of this study was therefore to  
38  
39 review the literature examining the association between clinically significant levels of  
40  
41 anxiety and dementia risk over a longer timescale (>10 years).  
42  
43  
44

## 45 **Methods**

46  
47  
48 This systematic review followed the Preferred Reporting Items for Systematic Reviews and  
49  
50 Meta-analyses (PRISMA) and Centre for Reviews and Dissemination (CRD) guidance for  
51  
52 undertaking reviews in health care [17].  
53  
54  
55  
56  
57  
58  
59  
60



### *Search strategy*

A systematic literature search of MEDLINE, PSYCINFO and EMBASE databases was conducted of articles published from inception up until 8<sup>th</sup> March 2017 to identify articles reporting analyses of the association between anxiety (as defined by clinical diagnosis or self-report scales with a clinically significant threshold) and dementia or MCI incidence. Search terms used consisted of: (dement\* OR Alzheimer\* OR “mild cognitive impairment” OR MCI) AND (anx\* OR “generalised anxiety disorder” OR GAD) AND (risk\* OR odds), as presented in online supplementary table ST1. We aimed to identify articles discussing (1) diagnosis of any type of dementia, (2) anxiety diagnosis, and (3) risk of dementia. The search was restricted to human studies and those published in English. Reference lists were searched for additional relevant articles. Searches were conducted by a single reviewer (AG). An independent review of all screened articles was conducted by a second reviewer (MS). Any disagreement was resolved by consensus with a third reviewer (NM), which occurred in two cases.

### *Selection Criteria and Article Screening*

Inclusion criteria were 1) a diagnosis of anxiety or an assessment of anxiety symptoms meeting diagnostic criteria using a standardised assessment tool, excluding populations with post-traumatic stress disorder (PTSD) or obsessive-compulsive disorder (OCD); 2) population-based studies where anxiety is assessed at least – on average – 10 years preceding final clinical assessment for dementia in line with previous meta-analyses on depression using intervals of at least 10 years [3]; 3) a diagnosis of dementia using validated criteria (e.g. Diagnostic Statistical Manual III-IV (DSM III-IV), International Classification of Diseases 10 (ICD-10)); 4) late-onset dementia diagnoses (aged  $\geq 65$  years). Eligible articles were identified by performing an initial screen of titles and abstracts, followed by a full

1  
2  
3 article review of those that passed screening. All retrospective and prospective studies that  
4  
5 met these criteria were selected.  
6

### 7 8 *Data extraction* 9

10 Outcome measures related to anxiety and dementia diagnosis were independently  
11  
12 extracted by two authors (AG, MS). Disagreements were resolved through discussion. Study  
13  
14 design, sample characteristics (including educational level and age), follow-up length,  
15  
16 dropout rate, anxiety (including measure and baseline score where appropriate), criteria for  
17  
18 assessing dementia, and measurements of depression as a confounder (including measure  
19  
20 and baseline score), were recorded. In cases of insufficient data, authors were contacted by  
21  
22 email.  
23  
24  
25

26  
27 INSERT FIGURE 1  
28

### 29 30 *Study Quality* 31

32 Two authors (AG, MS) independently assessed study quality and risk of bias using the  
33  
34 Newcastle-Ottawa scale, which contains separate quality assessment instruments for case-  
35  
36 control and cohort studies.  
37  
38

## 39 40 **Results** 41

### 42 43 *Literature Search* 44

45 The literature search detected 3509 citations, of which two were duplicates. One further  
46  
47 paper was identified manually during reference screening. After screening titles and  
48  
49 abstracts, 18 full-text articles were assessed for eligibility. Fourteen articles were excluded  
50  
51 based on criteria described earlier (Figure 1), four studies were included in the final review  
52  
53 [18–21].  
54  
55  
56  
57  
58  
59  
60

### *Study Characteristics*

Characteristics of the four selected studies are shown in Table 1. Clinically significant anxiety was documented based on clinical diagnosis using International Classification of Diseases 10 (ICD-10) criteria (n = 2), the State Trait Anxiety Inventory (STAI, n = 1) and a subscale of the State Trait Personality Inventory (STPI, n = 1).

Gallacher et al. (2009) measured anxiety using the STAI, which has a range from 20 to 80 [22], and is a validated measure for assessing anxiety symptoms. A clinically significant cut-off of 39-40 has been proposed [23,24]. Gallacher et al. (2009) categorised 'high anxiety' as having a STAI score between 35 and 72, compared to a 'low anxiety' group who had a STAI score between 20 and 34. Boot et al. (2013) and Zilkens et al. (2014) used ICD-10 criteria to diagnose an anxiety disorder.

Petkus et al. (2016) assessed anxiety using state anxiety subscale of the State-Trait Personality Inventory (STPI), which contains a subset of items from the STAI. Participants scoring at least one standard deviation above the population mean, equating to a score of  $\geq 25$  out of 40, were categorised having 'high anxiety'. Although there is no established cut-off for clinically significant anxiety using this scale, scores greater than 1 SD above the population mean are likely to represent a group with a high anxiety symptom burden. After discussion amongst the reviewers (AG, MS, NLM), we reached a consensus judgement that the study was suitable for inclusion in this review.

Dementia diagnosis was in most cases assessed using DSM III-IV (n = 2) or ICD-10 criteria (n = 1), although the study by Boot et al. (2013) assessed Dementia with Lewy Bodies (DLB) by clinical diagnosis using published criteria [25].

1  
2  
3 Sample sizes of the studies ranged from 441 to 27 136 participants, recruited from both or  
4  
5 either community and hospital inpatient/outpatient populations. Gallacher et al. (2009) and  
6  
7 Petkus et al. (2016) conducted prospective cohort studies using a community twin-  
8  
9 population that excluded dementia at baseline. Zilkens et al. (2014), and Boot et al. (2013)  
10  
11 conducted matched case-control studies, which retrospectively analysed community and  
12  
13 hospital records of individuals with dementia or case-matched controls for anxiety diagnosis  
14  
15 and therefore did not include a cognitive assessment at baseline to exclude dementia.  
16  
17 Zilkens et al. (2014) drew controls from the electoral roll, whereas Boot et al. (2013) drew  
18  
19 them from the community-dwelling persons included in the Mayo Clinic Study of Aging. The  
20  
21 proportion of females in each study ranged from 0 to 56.6%. Educational level was recorded  
22  
23 for all but one study; which ranged from 55% with no qualifications to 95% with >9 years of  
24  
25 education.  
26  
27  
28  
29  
30

31 INSERT TABLE 1  
32  
33

### 34 *Anxiety diagnosis association with dementia*

35

36 All studies included in this review found a significant increase in the number of dementia  
37  
38 diagnoses in patients who had a clinical anxiety diagnosis or experienced clinically significant  
39  
40 anxiety symptoms on average at least 10 years prior to their diagnosis of dementia; Zilkens  
41  
42 et al. (2014): OR = 1.61 (95% CI 1.28-2.02), Boot et al. (2013): OR = 7.4 (95% CI 3.5-16),  
43  
44 Gallacher et al. (2009): OR = 1.62 (95% CI 0.59-4.41) and Petkus et al. (2016): OR = 1.48 (95%  
45  
46 CI 1.01-2.18), respectively [18–21]. On the whole, retrospective studies that looked back for  
47  
48 life-long diagnoses of anxiety found a stronger association between mid-life anxiety and  
49  
50 later dementia diagnosis, than prospective studies investigating an association over a  
51  
52 shorter time period. Additionally, Petkus et al. (2016) demonstrated that the association  
53  
54  
55  
56  
57  
58  
59  
60

1  
2  
3 between high anxiety and dementia diagnosis remained when they excluded participants  
4  
5 who developed dementia within 5 years of the baseline assessment. This subsample had an  
6  
7 average interval between baseline and dementia diagnosis of 14.7 years (SD 6.7 years). Both  
8  
9 lend support that the associations found were independent of prodromal dementia  
10  
11  
12 symptoms.

13  
14  
15 Each study controlled for a range of demographic factors, with all controlling for vascular  
16  
17 and other psychiatric risk factors (Table 2 and 3). All studies assessed and controlled for  
18  
19 depression symptoms in their analysis. Boot et al. (2013) found a stronger association  
20  
21 between anxiety diagnosis alone with future dementia than either depression diagnosis  
22  
23 alone or mixed anxiety and depression diagnosis, although the number of individuals with  
24  
25 anxiety was markedly larger than those in the other two categories (anxiety alone n=168;  
26  
27 depression alone n=52; anxiety and depression n=56). Although Zilkens et al. (2014)  
28  
29 assessed a range of psychiatric diagnoses including anxiety and depression, they did not  
30  
31 assess their interaction. Petkus et al. (2016) and Gallacher et al. (2009), whilst controlling for  
32  
33 depression, made no assessment of the comparative strength of relationship or their  
34  
35 interaction.  
36  
37  
38  
39

#### 40 *Study Quality Rating*

41  
42  
43 All studies included were rated highly on the Newcastle-Ottawa scale [26]. From a maximum  
44  
45 score of 9, Boot et al (2013) was rated 8; and Zilkens et al. (2014), Petkus et al. (2016) and  
46  
47 Gallacher et al. (2009) were each rated 7. These studies were of similar quality to those  
48  
49 included in a recent meta-analysis examining dementia risk estimates associated with late-  
50  
51 life depression [4].  
52  
53  
54  
55  
56  
57  
58  
59  
60

1  
2  
3 Three of the studies had representative samples of community populations; the fourth led  
4  
5 by Gallacher et al. (2009) included only men. All controlled for a range of both demographic,  
6  
7 physical and psychological health factors. All outcomes were assessed either via secure  
8  
9 health records, or independent validation. Gallacher et al. (2009) experienced 20% loss to  
10  
11 follow-up, which compares favourably to the pre-mentioned Cherbuin et al. (2015) review,  
12  
13 which considered studies with an attrition rate of between 4.3% and 55.46%, and a review  
14  
15 of MCI drug studies with attrition rates varying from 12% to 49% [27]. Petkus et al. (2016)  
16  
17 did not clearly report loss to follow-up. For both case-control studies, the primary care  
18  
19 records did not include a cognitive assessment at baseline. Therefore, pre-existing cognitive  
20  
21 impairment before diagnosis cannot be ruled out, although long look-back periods make this  
22  
23 less likely.  
24  
25  
26  
27

28  
29 INSERT TABLE 2

30  
31 INSERT TABLE 3

## 32 33 34 **Discussion**

35  
36 This systematic review found four high quality studies that all showed a positive association  
37  
38 between clinically significant anxiety and risk of late-onset dementia over a mean interval of  
39  
40 at least 10 years from anxiety assessment to dementia diagnosis, even after accounting for  
41  
42 potential confounders. This important finding provides further evidence that a common  
43  
44 mental health condition in mid-life is associated with later life neurodegenerative disorders.  
45  
46

47  
48 Anxiety symptomatology has previously been related to dementia risk and cognitive decline,  
49  
50 although not conclusively [10,28]. A recent systematic review reported a positive  
51  
52 association between anxiety symptoms and dementia diagnosis over a short time interval  
53  
54 [12]. In that review the majority of studies reported follow up periods between 2-3.8 years.  
55  
56  
57  
58  
59  
60

1  
2  
3 A single study had a follow up time of up to 11.8 years, however the average interval  
4  
5 between anxiety and dementia diagnosis may have been less than 10 years, therefore it was  
6  
7 not included in the current review [13]. Gulpers et al. found stronger associations with  
8  
9 smaller intervals between assessment of anxiety and dementia diagnosis. As a result, the  
10  
11 authors concluded that anxiety may result from a prodromal state of dementia, where an  
12  
13 increase in anxiety may be due to an individual's insight into their early, subjective  
14  
15 experience of cognitive decline [12]. Given the short time interval between assessments,  
16  
17 Gulpers et al. were unable to determine whether anxiety could also serve as an independent  
18  
19 risk for dementia. This review reports solely articles that were not included Gulpers et al.'s  
20  
21 analyses, and therefore furthers their work by providing an independent assessment of the  
22  
23 anxiety-dementia association. Effect sizes of the studies included in this review (1.48 - 7.4)  
24  
25 were comparable to the overall effect size found by Gulpers et al. (2016) of 1.61, suggesting  
26  
27 that the association between clinically significant mid-life anxiety and later-life dementia is  
28  
29 as strong as that between late-life anxiety symptoms and dementia.  
30  
31  
32  
33

34  
35 The prodromal phase of dementia can begin several years before objective dementia is  
36  
37 manifest. In the present review, we sought to minimise the potential influence of pre-  
38  
39 clinical cognitive decline by including only studies that assessed anxiety and dementia  
40  
41 diagnoses over an extended period. Three studies (Zilkens et al. 2014; Gallacher et al. 2009;  
42  
43 Petkus et al. 2016) demonstrated a mean interval of at least 10 years between the anxiety  
44  
45 and dementia evaluations. Boot et al. (2013) analysed participant's lifelong medical record,  
46  
47 however, the mean interval between anxiety and dementia diagnosis was not reported.  
48  
49  
50

51  
52 Findings from this review corroborate recent evidence that anxiety symptoms or diagnosis  
53  
54 are associated with risk of MCI [29,30]. These findings further complement the association  
55  
56  
57  
58  
59  
60

1  
2  
3 between depression and dementia diagnosis [4], which is particularly relevant due to high  
4  
5 levels of anxiety-depression comorbidity. Moreover, they lend support for the proposal that  
6  
7 multiple psychiatric risk factors are implicated together as a latent risk factor for dementia  
8  
9  
10 [2].

11  
12 It has recently been suggested that a longer interval period between anxiety and dementia  
13  
14 diagnosis may provide evidence for a common biological pathway linking anxiety,  
15  
16 depression, and dementia [20]. An abnormal stress response, such as exhibited in anxiety  
17  
18 disorders, may be associated with accelerated cellular ageing and neuro-progression (a  
19  
20 pathological reorganisation of the central nervous system) resulting in increased  
21  
22 neurodegeneration, neuronal apoptosis and lowered neuroplasticity [31]. Although  
23  
24 glucocorticoid, inflammatory mediator and vascular disease mechanisms are hypothesised  
25  
26 [3,32], as yet, no convincing candidate biological mechanism linking anxiety and cognitive  
27  
28 impairment exists.  
29  
30  
31  
32  
33

34 The results of this review should be interpreted in the light of their limitations. Only studies  
35  
36 that had been published and written in English were included, which may limit extrapolation  
37  
38 across broader populations. Retrospective studies did not examine baseline cognition and  
39  
40 therefore cannot exclude early cognitive decline at the time of anxiety assessment,  
41  
42 however, the length of look-back, ranging from over 10 years to the first entry of an  
43  
44 individual's medical record, minimises the likelihood of cognitive impairment at baseline. To  
45  
46 account for high levels of anxiety-depression comorbidity, this review included only papers  
47  
48 discussing anxiety diagnosis alone, or those that controlled for depression symptomatology.  
49  
50  
51 However, the Zilkens et al. (2014) and Boot et al. (2013) cannot completely exclude overlap  
52  
53  
54 of these two commonly comorbid illnesses because their occurrence was ascertained from  
55  
56  
57  
58  
59  
60



1  
2  
3 lists of diagnoses in medical records. The use of read codes in retrospective studies may  
4  
5 have resulted in lower identification of individuals with clinically significant anxiety as a  
6  
7 result of inconsistent entry of read codes during evaluations, or of absence of clinical record  
8  
9 for non-help seekers [33]. Publication bias may also have influenced the studies included, as  
10  
11 positive findings may be more likely to have been published than studies finding no  
12  
13 association. Furthermore, results must be interpreted in the light of proposals that the  
14  
15 prodromal AD pathophysiologic processes may develop beyond 10 years before the onset of  
16  
17 clinical symptoms [34].

18  
19  
20  
21  
22 Whether reducing anxiety in middle-age would result in reduced risk of dementia remains  
23  
24 an open question. The effect of treatment of anxiety using pharmacologic and non-  
25  
26 pharmacologic therapies during midlife on later risk for dementia has not yet been  
27  
28 investigated. Benzodiazepines, commonly used in the treatment of anxiety, have been  
29  
30 shown to increase risk of mortality in some groups [35], and therefore cannot be considered  
31  
32 a measure to reduce dementia incidence in those with clinical anxiety. It is possible that  
33  
34 diverse non-pharmacological therapies, including talking therapies [36] and mindfulness-  
35  
36 based interventions and meditation practices [37], that are known to reduce anxiety in  
37  
38 midlife, could have a risk-reducing effect, although this is yet to be thoroughly researched.  
39  
40  
41  
42

43 Given the high prevalence of anxiety seen in primary care, we suggest that general  
44  
45 practitioners could consider anxiety alongside depression as an indicator of risk factor for  
46  
47 dementia. To improve the rate of earlier diagnosis of dementia, close monitoring of subtle  
48  
49 cognitive decline in older adults with a history of anxiety, depression and cerebrovascular  
50  
51 disease would be encouraged. This review expands our understanding of anxiety as a  
52  
53 potentially modifiable risk for dementia. Given the limited number of studies investigating  
54  
55  
56  
57  
58  
59  
60

1  
2  
3 the anxiety-dementia relationship, further research is required to assess underlying  
4  
5 mechanisms that link these disorders, and to disambiguate anxiety's potential role as a risk  
6  
7 factor as separate from a prodromal symptom of dementia.  
8  
9

## 10 **Acknowledgements**

11  
12  
13 This work was supported by a grant from the British Geriatrics Society. We would like to  
14  
15 thank Dr Bradley Boeve (Mayo Clinic College of Medicine, Rochester), Dr Claire Burton  
16  
17 (Keele University), and Dr Andrew Petkus (University of Southern California) for providing  
18  
19 clarification of articles screened for inclusion in support of this work. NLM was supported by  
20  
21 University College London and Alzheimer's Society (AS-SF-15b-002). JDH was funded by an  
22  
23 MRC research training fellowship (G0901982).  
24  
25  
26

## 27 **Contributors**

28  
29  
30 AG contributed to design of the study, data screening and extraction, drafting of the  
31  
32 manuscript and submission. MS contributed to literature search, data screening and  
33  
34 extraction, and manuscript preparation. JDH contributed to the study design, provided  
35  
36 methodological expertise and editing of the manuscript. NLM contributed to the  
37  
38 conception and study design, data interpretation, and editing of the manuscript.  
39  
40  
41  
42

## 43 **Competing interests**

44  
45  
46 None of the contributing authors have any conflicting interests to declare.  
47  
48

## 49 **Data sharing statement**

50  
51  
52 No additional data are available.  
53  
54  
55  
56  
57  
58  
59  
60

## References

- [1] Fillit H, Nash D, Rundek T, Zuckerman A. Cardiovascular risk factors and dementia. *Am J Geriatr Pharmacother* 2008;6:100–18.
- [2] Marchant NL, Howard RJ. Cognitive debt and Alzheimer's disease. *J Alzheimers Dis* 2015;44:755–70.
- [3] Ownby R, Crocco E, Acevedo A, John V, Loewenstein D. Depression and Risk for Alzheimer Disease: a systematic review, meta-analysis and metaregression analysis. *Arch Gen Psychiatry* 2006;63:530.
- [4] Cherbuin N, Kim S, Anstey KJ. Dementia risk estimates associated with measures of depression: a systematic review and meta-analysis. *BMJ Open* 2015;5:e008853.
- [5] Diniz BS, Butters MA, Albert SM, Dew MA, Reynolds CF, Byers A, et al. Late-life depression and risk of vascular dementia and Alzheimer's disease: systematic review and meta-analysis of community-based cohort studies. *Br J Psychiatry* 2013;202:329–35.
- [6] Singh-Manoux A, Dugravot A, Fournier A, Abell J, Ebmeier K, Kivimäki M, et al. Trajectories of Depressive Symptoms Before Diagnosis of Dementia. *JAMA Psychiatry* 2017;74:712.
- [7] Bandelow B, Michaelis S. Epidemiology of anxiety disorders in the 21st century. *Dialogues Clin Neurosci* 2015;17:327–35.
- [8] Gallagher D, Coen R, Kilroy D, Belinski K, Bruce I, Coakley D, et al. Anxiety and behavioural disturbance as markers of prodromal Alzheimer's disease in patients with mild cognitive impairment. *Int J Geriatr Psychiatry* 2011;26:166–72.
- [9] Palmer K, Berger AK, Monastero R, Winblad B, Backman L, Fratiglioni L. Predictors of progression from mild cognitive impairment to Alzheimer disease. *Neurology* 2007;68:1596–602.
- [10] Yochim BP, Mueller AE, Segal DL. Late life anxiety is associated with decreased memory and executive functioning in community dwelling older adults. *J Anxiety Disord* 2013;27:567–75.
- [11] Beaudreau SA, O'Hara R. Late-life anxiety and cognitive impairment: a review. *Am J Geriatr Psychiatry* 2008;16:790–803.
- [12] Gulpers B, Ramakers I, Hamel R, Kohler S, Voshaar R, Verhey F. Anxiety as a Predictor for Cognitive Decline and Dementia: A Systematic Review and Meta-analysis. *Am J Geriatr Psychiatry* 2016.
- [13] de Bruijn RFAG, Direk N, Mirza SS, Hofman A, Koudstaal PJ, Tiemeier H, et al. Anxiety is not associated with the risk of dementia or cognitive decline: the Rotterdam Study. *Am J Geriatr Psychiatry* 2014;22:1382–90.
- [14] Burton C, Campbell P, Jordan K, Strauss V, Mallen C. The association of anxiety and depression with future dementia diagnosis: A case-control study in primary care. *Fam Pract* 2013;30:25–30.
- [15] Wilson RS, Leurgans SE, Boyle PA, Bennett DA. Cognitive decline in prodromal

- 1  
2  
3 Alzheimer disease and mild cognitive impairment. *Arch Neurol* 2011;68:351–6.
- 4  
5 [16] Gauthier S, Reisberg B, Zaudig M, Petersen RC, Ritchie K, Broich K, et al. Mild  
6 cognitive impairment. *Lancet* 2006;367:1262–70.
- 7  
8 [17] Centre for Reviews and Dissemination. CRD's Guidance for undertaking reviews in  
9 health care. 2009.
- 10  
11 [18] Zilkens RR, Bruce DG, Duke J, Spilsbury K, Semmens JB. Severe psychiatric  
12 disorders in mid-life and risk of dementia in late-life (age 65-84 years): A population  
13 based case-control study. *Curr Alzheimer Res* 2014;11:681–93.
- 14  
15 [19] Boot BP, Orr CF, Ahlskog JE, Ferman TJ, Roberts R, Pankratz VS, et al. Risk factors  
16 for dementia with Lewy bodies: a case-control study. *Neurology* 2013;81:833–40.
- 17  
18 [20] Gallacher J, Bayer A, Fish M, Pickering J, Pedro S, Dunstan F, et al. Does anxiety  
19 affect risk of dementia? Findings from the Caerphilly Prospective Study. *Psychosom*  
20 *Med* 2009;71:659–66.
- 21  
22 [21] Petkus AJ, Reynolds CA, Wetherell JL, Kremen WS, Pedersen NL, Gatz M, et al.  
23 Anxiety is associated with increased risk of dementia in older Swedish twins.  
24 *Alzheimer's Dement* 2016;12:399–406.
- 25  
26 [22] Spielberger C. Manual for the State-Trait Anxiety Inventory. 1983.
- 27  
28 [23] Julian LJ. Measures of anxiety: State-Trait Anxiety Inventory (STAI), Beck Anxiety  
29 Inventory (BAI), and Hospital Anxiety and Depression Scale-Anxiety (HADS-A).  
30 *Arthritis Care Res (Hoboken)* 2011:S467-72.
- 31  
32 [24] Knight RG, Waal-Manning HJ, Spears GF. Some norms and reliability data for the  
33 State-Trait Anxiety Inventory and the Zung Self-Rating Depression scale. *Br J Clin*  
34 *Psychol* 1983;22:245–9.
- 35  
36 [25] McKeith IG, Dickson DW, Lowe J, Emre M, O'Brien JT, Feldman H, et al. Diagnosis  
37 and management of dementia with Lewy bodies: Third report of the DLB consortium.  
38 *Neurology* 2005;65:1863–72.
- 39  
40 [26] Wells G, Shea B, O'Connell D, Peterson J, Welch V, Losos M, et al. The Newcastle-  
41 Ottawa Scale (NOS) for assessing the quality if nonrandomized studies in meta-  
42 analyses. (Available from URL  
43 [Http://www.ohri.ca/programs/clinical\\_epidemiology/oxford.asp](http://www.ohri.ca/programs/clinical_epidemiology/oxford.asp)) 2012:2012.
- 44  
45 [27] Jelic V, Kivipelto M, Winblad B. Clinical trials in mild cognitive impairment: lessons for  
46 the future. *J Neurol Neurosurg Psychiatry* 2006;77:429–38.
- 47  
48 [28] Bierman EJM, Comijs HC, Rijmen F, Jonker C, Beekman ATF. Anxiety symptoms and  
49 cognitive performance in later life: results from the longitudinal aging study  
50 Amsterdam. *Aging Ment Health* 2008;12:517–23.
- 51  
52 [29] Jacob L, Bohlken J, Kostev K. Risk Factors for Mild Cognitive Impairment in German  
53 Primary Care Practices. *J Alzheimer's Dis* 2017;56:379–84.
- 54  
55 [30] Kassem AM, Ganguli M, Yaffe K, Hanlon JT, Lopez OL, Wilson JW, et al. Anxiety  
56 symptoms and risk of dementia and mild cognitive impairment in the oldest old  
57 women. *Aging Ment Health* 2017:1–9.
- 58  
59  
60

- 1  
2  
3 [31] Perna G, Iannone G, Alciati A, Caldirola D. Are Anxiety Disorders Associated with  
4 Accelerated Aging? A Focus on Neuroprogression. *Neural Plast* 2016;2016:1–19.  
5  
6 [32] Sapolsky RM. Glucocorticoids and hippocampal atrophy in neuropsychiatric disorders.  
7 *Arch Gen Psychiatry* 2000;57:925–35.  
8  
9 [33] Davé S, Petersen I. Creating medical and drug code lists to identify cases in primary  
10 care databases. *Pharmacoepidemiol Drug Saf* 2009;18:704–7.  
11  
12 [34] Pietrzak RH, Lim YY, Neumeister A, Ames D, Ellis KA, Harrington K, et al. Amyloid- $\beta$ ,  
13 anxiety, and cognitive decline in preclinical Alzheimer disease: a multicenter,  
14 prospective cohort study. *JAMA Psychiatry* 2015;72:284–91.  
15  
16 [35] Fontanella CA, Campo J V., Phillips GS, Hiance-Steelesmith DL, Sweeney HA, Tam  
17 K, et al. Benzodiazepine Use and Risk of Mortality Among Patients With  
18 Schizophrenia. *J Clin Psychiatry* 2016;77:661–7.  
19  
20 [36] Orgeta V, Qazi A, Spector AE, Orrell M. Psychological treatments for depression and  
21 anxiety in dementia and mild cognitive impairment. In: Orgeta V, editor. *Cochrane*  
22 *Database Syst. Rev.*, Chichester, UK: John Wiley & Sons, Ltd; 2014.  
23  
24 [37] Khoury B, Lecomte T, Fortin G, Masse M, Therien P, Bouchard V, et al. Mindfulness-  
25 based therapy: A comprehensive meta-analysis. *Clin Psychol Rev* 2013;33:763–71.  
26  
27  
28  
29  
30  
31  
32  
33  
34  
35  
36  
37  
38  
39  
40  
41  
42  
43  
44  
45  
46  
47  
48  
49  
50  
51  
52  
53  
54  
55  
56  
57  
58  
59  
60

**Figure 1** Flowchart of the search and study selection process; \* = manually identified from Petkus et al. (2016)

**Table 1** Study Characteristics

|                      | Study type and setting; location | Follow-up/ Look back period; years (SD)                                                     | Mean age years (SD)                                            | Female n (%)                              | Education level; no. (%) | Drop-out rate/Non-response rate %     | Baseline cognition measure  | Anxiety measure; cut-off                              | Baseline anxiety, %                                                                                                           | Controls for depression; baseline depression measure | Dementia diagnosis; criteria (no. cases); OR/HR (95% CI) |                                                                                                               |
|----------------------|----------------------------------|---------------------------------------------------------------------------------------------|----------------------------------------------------------------|-------------------------------------------|--------------------------|---------------------------------------|-----------------------------|-------------------------------------------------------|-------------------------------------------------------------------------------------------------------------------------------|------------------------------------------------------|----------------------------------------------------------|---------------------------------------------------------------------------------------------------------------|
| 10<br>11<br>12       | Boot et al. 2013 (n=441)         | Population based matched case-controlled, Mayo Clinic Rochester, Minnesota, USA             | Lifelong diagnoses documented by medical record                | 72.5 (7.3) – DLB cases age at diagnosis   | 103 (23.1)               | >9 yrs education; (95)                | NR                          | NR                                                    | Clinical diagnosis, present in medical history section of medical record                                                      | 23, 27% cases; 14, 5% controls                       | Yes; clinical diagnosis from medical history record      | DLB diagnosis by behavioural neurologist; published criteria by McKeith et al (2005) (n=147); OR 7.4 (3.5-16) |
| 13<br>14<br>15<br>16 | Gallacher et al. 2009 (n=1160)   | Prospective, community based cohort; Caerphilly, Wales, UK                                  | Mean follow up period; 17.3 (1.3)                              | 56.1 (4.4) – mean age at inclusion        | 0                        | no qualifications; 601 (55)           | 20                          | NR; dementia unlikely at inclusion (mean age <60 yrs) | STAI; score of ≥35                                                                                                            | 585, 50%                                             | Yes; GHQ-30                                              | Dementia diagnosis; DSM-IV or medical records (n=90); OR 1.62 (0.59-4.41)                                     |
| 17<br>18<br>19       | Petkus et al. 2016 (n=1082)      | Prospective, community based cohort; Swedish twins drawn from Swedish Twin Registry, Sweden | Follow up period; 28 (0)                                       | 60.86 (11.15) – mean age at inclusion     | 612 (56.6)               | Beyond elementary education; 423 (39) | 29.8                        | MMSE                                                  | State anxiety subscale of STPI; STPI > 1 SD Q1-Q4 (assessments over 4 time-points)                                            | 403, 37%                                             | Yes; OARS depression subscale, CES-D                     | Dementia diagnosis; DSM-III or DMS-IV (n=172); HR 1.48 (1.01-2.18)                                            |
| 20<br>21<br>22<br>23 | Zilkens et al. 2014 (n=27136)    | Population based matched case-controlled, Western Australia                                 | Mean look back period; cases 20.4 (10.4), controls 20.0 (10.3) | 78.7 (4.7) – mean age at final time point | 15359 (56.6)             | NR                                    | 6.17 (excluded individuals) | NR                                                    | Clinical diagnosis using ICD-10 AM (Australian Modification) codes documented in health records; meeting diagnostic threshold | 379, 2.8% cases                                      | Yes; clinical diagnosis by GP                            | Dementia diagnosis; ICD-10 (n=13568); OR 1.61 (1.28-2.02) (>10 years look back period)                        |

(CES-D = Centre of Epidemiological Studies depression subscale, DLB = Dementia with Lewy bodies, GHQ-30 = 30-item general health questionnaire, NR = not recorded; OARS = older American resources and services; STAI = State trait anxiety inventory; STPI = State trait personality inventory)

**Table 2** Case controlled studies: Newcastle-Ottawa scale for assessment of quality of included case controlled studies (+ / - represents whether individual criterion within the subsection was fulfilled)

|                                                                     | Acceptable Criteria                                                                 | Zilkens et al. 2014                                                                                                                                                                                       |          | Boot et al. 2013                                                                                                                                                                                                                                       |          |
|---------------------------------------------------------------------|-------------------------------------------------------------------------------------|-----------------------------------------------------------------------------------------------------------------------------------------------------------------------------------------------------------|----------|--------------------------------------------------------------------------------------------------------------------------------------------------------------------------------------------------------------------------------------------------------|----------|
| <b>Selection</b>                                                    |                                                                                     |                                                                                                                                                                                                           |          |                                                                                                                                                                                                                                                        |          |
| Case definition                                                     | With independent validation                                                         | Record linkage from Western Australian Data Linkage System and Death Registry, no independent validation                                                                                                  | -        | Assessment for DLB using behavioural neurologist                                                                                                                                                                                                       | +        |
| Representativeness of cases                                         | Consecutive or representative series of cases                                       | All dementia cases in period 2000-2009 identified via read-code; lower limit index dementia age 65 years, upper limit 84 years; dementia in other diseases excluded                                       | +        | Recruited from longitudinal studies in period 1984-2013 (Alzheimer Disease Patient Registry, Alzheimer Disease Research Centre Study, and Mayo Clinic Study of Ageing); community dwelling persons aged 70-89 years; excluded structural brain lesions | +        |
| Selection of controls                                               | Community controls                                                                  | Population controls; randomly selected from electoral role aged ≥65 years prior to extraction of health data for controls                                                                                 | +        | Community controls from longitudinal study of ageing; individuals aged ≥65 years; selected if seen by physician in same month as clinical subject diagnosed; matched by age and sex                                                                    | +        |
| Definition of controls                                              | No history of disease                                                               | Excluded if dementia read-code in records; no independent screening                                                                                                                                       | +        | Excluded if diagnosed with DLB/AD during the study, previous stroke, head injury, neurologic disease or movement disorder; extensive cognitive and medical examination                                                                                 | +        |
| <b>Comparability</b>                                                |                                                                                     |                                                                                                                                                                                                           |          |                                                                                                                                                                                                                                                        |          |
| Comparability of cases and controls on basis of design and analysis | Study controls for the most important factor (+/-), and any additional factor (+/-) | Controls for age, sex, vascular risk factors (diabetes, IHD, AF, CVD, hypertension, hyperlipidaemia, heart failure and past or current smoking), head injury, alcohol dependence syndrome, and depression | +        | Controls for age, sex; multivariate analyses control for family history, depression, APOE ε4 alleles, education level, head injury, cancer, and vascular risk factors (stroke, diabetes, alcohol, smoking)                                             | +        |
| <b>Exposure</b>                                                     |                                                                                     |                                                                                                                                                                                                           |          |                                                                                                                                                                                                                                                        |          |
| Ascertainment of exposure                                           | Secure record, structured interview by healthcare practitioner                      | Secure administrative health record, read-codes for mid-life factors documented between aged 30-65 years within years 1966-2009                                                                           | +        | Anxiety history from medical history section of medical record                                                                                                                                                                                         | +        |
| Same method of ascertainment for cases and controls                 | Yes                                                                                 | Yes; review of risk factor read-codes                                                                                                                                                                     | +        | Yes; review of medical history                                                                                                                                                                                                                         | +        |
| Non-response rate                                                   | Similar for both cases and controls                                                 | NR                                                                                                                                                                                                        | -        | NR                                                                                                                                                                                                                                                     | -        |
| <b>Total Score</b>                                                  |                                                                                     |                                                                                                                                                                                                           | <b>7</b> |                                                                                                                                                                                                                                                        | <b>8</b> |

(DLB = Dementia with Lewy bodies; NR = not recorded)

**Table 3** Cohort studies: Newcastle-Ottawa scale for assessment of quality of included cohort studies  
(+ / - represents whether individual criterion within the subsection was fulfilled)

|                                                                          | Acceptable Criteria                                                                 | Petkus et al. 2016                                                                                                                                                                                                      |          | Gallacher et al. 2009                                                                                                                                                                                                                         |          |
|--------------------------------------------------------------------------|-------------------------------------------------------------------------------------|-------------------------------------------------------------------------------------------------------------------------------------------------------------------------------------------------------------------------|----------|-----------------------------------------------------------------------------------------------------------------------------------------------------------------------------------------------------------------------------------------------|----------|
| <b>Selection</b>                                                         |                                                                                     |                                                                                                                                                                                                                         |          |                                                                                                                                                                                                                                               |          |
| Representativeness of exposed cohort                                     | Representative of average adult in the community (age/sex)                          | Population based Swedish twin registry, subsample of twins aged ≥ 50 years                                                                                                                                              | +        | Men only, representative of male inhabitants of Caerphilly region                                                                                                                                                                             | -        |
| Selection of non-exposed cohort                                          | Drawn from same community as exposed cohort                                         | Drawn from same community as exposed cohort                                                                                                                                                                             | +        | Drawn from same community as exposed cohort                                                                                                                                                                                                   | +        |
| Ascertainment of exposure                                                | Secured records, clinical diagnosis using diagnostic tools (ICD-10/DSM-V)           | State anxiety subscale of the State-Trait Personality Inventory (STPI), containing a subset of items from the STAI                                                                                                      | +        | Structured interview using STAI                                                                                                                                                                                                               | +        |
| Demonstration that outcome of interest was not present at start of study | Assessment for dementia at initial enrolment                                        | No baseline screening, exclusion if previous dementia diagnosis, age at inclusion (mean age 60.86 years) makes cognitive impairment unlikely                                                                            | -        | Age at inclusion (mean age 56.1 years) makes cognitive impairment unlikely                                                                                                                                                                    | -        |
| <b>Comparability</b>                                                     |                                                                                     |                                                                                                                                                                                                                         |          |                                                                                                                                                                                                                                               |          |
| Comparability of cohorts on basis of design or analysis                  | Study controls for the most important factor (+), and for any additional factor (+) | Multivariate models control for depression symptoms, baseline age, sex, education, physical illness                                                                                                                     | +        | Study controls for age, social class, marital status, vascular risk factors (alcohol consumption, BP, BMI, total cholesterol, previous vascular disease), educational ability (National Adult Reading Test), and depression symptoms (GHQ-30) | +        |
| <b>Exposure</b>                                                          |                                                                                     |                                                                                                                                                                                                                         |          |                                                                                                                                                                                                                                               |          |
| Assessment of outcome                                                    | Independent blind assessment, record linkage                                        | Screening for dementia using MMSE, cognitive in-person testing (assessing a range of cognitive domains), DSM-III or IV, and record linkage using National Patient Registry and National Patient Cause of Death Registry | +        | Cognitive function assessed using CAMDEX, FAB, CDR; diagnosis made using DSM-IV, screening of primary care and hospital records                                                                                                               | +        |
| Follow up adequate for outcome to occur                                  | Follow up >10 years                                                                 | 28 years                                                                                                                                                                                                                | +        | >20 years                                                                                                                                                                                                                                     | +        |
| Adequacy of follow up of cohorts                                         | Complete follow up, or subjects lost to follow-up unlikely to introduce bias        | NR                                                                                                                                                                                                                      | -        | 20% lost to follow up                                                                                                                                                                                                                         | +        |
| <b>Total Score</b>                                                       |                                                                                     |                                                                                                                                                                                                                         | <b>7</b> |                                                                                                                                                                                                                                               | <b>7</b> |

(BMI = body mass index; BP = blood pressure; CAMDEX = Cambridge mental disorders of the elderly examination; CDR = clinical dementia rating; DSM III/IV/V = Diagnostic and statistical manual of mental disorders III/IV/V; FAB = frontal assessment battery; GHQ-30 = 30-item general health questionnaire; ICD-10 = International classification of diseases 10; MMSE = mini mental state examination; NR = not recorded; STAI = State trait anxiety inventory)





Figure 1 Flowchart of the search and study selection process; \* = manually identified from Petkus et al. (2016)

175x106mm (300 x 300 DPI)

## Example Search Strategy

Search carried out in Ovid MEDLINE(R) from 1946 to October Week 3 2017

| #  | Searches                                                                                                                                 | Results |
|----|------------------------------------------------------------------------------------------------------------------------------------------|---------|
| 1  | dement*.mp. [mp=ti, ot, ab, tx, kw, ct, sh, nm, hw, kf, px, rx, an, ui, eu, pm, sy, tc, id, tm, tn, dm, mf, dv, fs]                      | 101878  |
| 2  | limit 1 to (english language and humans)                                                                                                 | 84635   |
| 3  | alzheimer*.mp. [mp=ti, ot, ab, tx, kw, ct, sh, nm, hw, kf, px, rx, an, ui, eu, pm, sy, tc, id, tm, tn, dm, mf, dv, fs]                   | 123908  |
| 4  | limit 3 to (english language and humans)                                                                                                 | 98174   |
| 5  | mild cognitive impairment.mp. [mp=ti, ot, ab, tx, kw, ct, sh, nm, hw, kf, px, rx, an, ui, eu, pm, sy, tc, id, tm, tn, dm, mf, dv, fs]    | 10469   |
| 6  | limit 5 to (english language and humans)                                                                                                 | 9789    |
| 7  | MCI.mp. [mp=ti, ot, ab, tx, kw, ct, sh, nm, hw, kf, px, rx, an, ui, eu, pm, sy, tc, id, tm, tn, dm, mf, dv, fs]                          | 12968   |
| 8  | limit 7 to (english language and humans)                                                                                                 | 10517   |
| 9  | 2 OR 4 OR 6 OR 8                                                                                                                         | 155363  |
| 10 | anx*.mp. [mp=ti, ot, ab, tx, kw, ct, sh, nm, hw, kf, px, rx, an, ui, eu, pm, sy, tc, id, tm, tn, dm, mf, dv, fs]                         | 196896  |
| 11 | limit 10 to (english language and humans)                                                                                                | 154215  |
| 12 | generalised anxiety disorder.mp. [mp=ti, ot, ab, tx, kw, ct, sh, nm, hw, kf, px, rx, an, ui, eu, pm, sy, tc, id, tm, tn, dm, mf, dv, fs] | 475     |
| 13 | limit 12 to (english language and humans)                                                                                                | 438     |
| 14 | GAD.mp. [mp=ti, ot, ab, tx, kw, ct, sh, nm, hw, kf, px, rx, an, ui, eu, pm, sy, tc, id, tm, tn, dm, mf, dv, fs]                          | 7550    |
| 15 | limit 14 to (english language and humans)                                                                                                | 4299    |
| 16 | 11 OR 13 OR 15                                                                                                                           | 156261  |
| 17 | risk*.mp. [mp=ti, ot, ab, tx, kw, ct, sh, nm, hw, kf, px, rx, an, ui, eu, pm, sy, tc, id, tm, tn, dm, mf, dv, fs]                        | 2086806 |
| 18 | limit 17 to (english language and humans)                                                                                                | 1757965 |
| 19 | odds.mp. [mp=ti, ot, ab, tx, kw, ct, sh, nm, hw, kf, px, rx, an, ui, eu, pm, sy, tc, id, tm, tn, dm, mf, dv, fs]                         | 268449  |
| 20 | limit 19 to (english language and humans)                                                                                                | 257505  |
| 21 | 18 OR 20                                                                                                                                 | 1849508 |
| 22 | 9 AND 16 AND 21                                                                                                                          | 776     |



# PRISMA 2009 Checklist

| Section/topic                      | #  | Checklist item                                                                                                                                                                                                                                                                                              | Reported on page # |
|------------------------------------|----|-------------------------------------------------------------------------------------------------------------------------------------------------------------------------------------------------------------------------------------------------------------------------------------------------------------|--------------------|
| <b>TITLE</b>                       |    |                                                                                                                                                                                                                                                                                                             |                    |
| Title                              | 1  | Identify the report as a systematic review, meta-analysis, or both.                                                                                                                                                                                                                                         | 2                  |
| <b>ABSTRACT</b>                    |    |                                                                                                                                                                                                                                                                                                             |                    |
| Structured summary                 | 2  | Provide a structured summary including, as applicable: background; objectives; data sources; study eligibility criteria, participants, and interventions; study appraisal and synthesis methods; results; limitations; conclusions and implications of key findings; systematic review registration number. | 2                  |
| <b>INTRODUCTION</b>                |    |                                                                                                                                                                                                                                                                                                             |                    |
| Rationale                          | 3  | Describe the rationale for the review in the context of what is already known.                                                                                                                                                                                                                              | 4,5                |
| Objectives                         | 4  | Provide an explicit statement of questions being addressed with reference to participants, interventions, comparisons, outcomes, and study design (PICOS).                                                                                                                                                  | 5                  |
| <b>METHODS</b>                     |    |                                                                                                                                                                                                                                                                                                             |                    |
| Protocol and registration          | 5  | Indicate if a review protocol exists, if and where it can be accessed (e.g., Web address), and, if available, provide registration information including registration number.                                                                                                                               | 5                  |
| Eligibility criteria               | 6  | Specify study characteristics (e.g., PICOS, length of follow-up) and report characteristics (e.g., years considered, language, publication status) used as criteria for eligibility, giving rationale.                                                                                                      | 6                  |
| Information sources                | 7  | Describe all information sources (e.g., databases with dates of coverage, contact with study authors to identify additional studies) in the search and date last searched.                                                                                                                                  | 5                  |
| Search                             | 8  | Present full electronic search strategy for at least one database, including any limits used, such that it could be repeated.                                                                                                                                                                               | 6                  |
| Study selection                    | 9  | State the process for selecting studies (i.e., screening, eligibility, included in systematic review, and, if applicable, included in the meta-analysis).                                                                                                                                                   | 6                  |
| Data collection process            | 10 | Describe method of data extraction from reports (e.g., piloted forms, independently, in duplicate) and any processes for obtaining and confirming data from investigators.                                                                                                                                  | 6,7                |
| Data items                         | 11 | List and define all variables for which data were sought (e.g., PICOS, funding sources) and any assumptions and simplifications made.                                                                                                                                                                       | 7                  |
| Risk of bias in individual studies | 12 | Describe methods used for assessing risk of bias of individual studies (including specification of whether this was done at the study or outcome level), and how this information is to be used in any data synthesis.                                                                                      | 10                 |
| Summary measures                   | 13 | State the principal summary measures (e.g., risk ratio, difference in means).                                                                                                                                                                                                                               | 2, 9               |
| Synthesis of results               | 14 | Describe the methods of handling data and combining results of studies, if done, including measures of consistency (e.g., $I^2$ ) for each meta-analysis.                                                                                                                                                   |                    |



# PRISMA 2009 Checklist

Page 1 of 2

| Section/topic                 | #  | Checklist item                                                                                                                                                                                           | Reported on page # |
|-------------------------------|----|----------------------------------------------------------------------------------------------------------------------------------------------------------------------------------------------------------|--------------------|
| Risk of bias across studies   | 15 | Specify any assessment of risk of bias that may affect the cumulative evidence (e.g., publication bias, selective reporting within studies).                                                             | 9                  |
| Additional analyses           | 16 | Describe methods of additional analyses (e.g., sensitivity or subgroup analyses, meta-regression), if done, indicating which were pre-specified.                                                         |                    |
| <b>RESULTS</b>                |    |                                                                                                                                                                                                          |                    |
| Study selection               | 17 | Give numbers of studies screened, assessed for eligibility, and included in the review, with reasons for exclusions at each stage, ideally with a flow diagram.                                          | 7,17               |
| Study characteristics         | 18 | For each study, present characteristics for which data were extracted (e.g., study size, PICOS, follow-up period) and provide the citations.                                                             | 6,7                |
| Risk of bias within studies   | 19 | Present data on risk of bias of each study and, if available, any outcome level assessment (see item 12).                                                                                                | 10,19,20           |
| Results of individual studies | 20 | For all outcomes considered (benefits or harms), present, for each study: (a) simple summary data for each intervention group (b) effect estimates and confidence intervals, ideally with a forest plot. |                    |
| Synthesis of results          | 21 | Present results of each meta-analysis done, including confidence intervals and measures of consistency.                                                                                                  |                    |
| Risk of bias across studies   | 22 | Present results of any assessment of risk of bias across studies (see Item 15).                                                                                                                          | 10,19,20           |
| Additional analysis           | 23 | Give results of additional analyses, if done (e.g., sensitivity or subgroup analyses, meta-regression [see Item 16]).                                                                                    |                    |
| <b>DISCUSSION</b>             |    |                                                                                                                                                                                                          |                    |
| Summary of evidence           | 24 | Summarize the main findings including the strength of evidence for each main outcome; consider their relevance to key groups (e.g., healthcare providers, users, and policy makers).                     | 8,9                |
| Limitations                   | 25 | Discuss limitations at study and outcome level (e.g., risk of bias), and at review-level (e.g., incomplete retrieval of identified research, reporting bias).                                            | 12,13              |
| Conclusions                   | 26 | Provide a general interpretation of the results in the context of other evidence, and implications for future research.                                                                                  | 11,12,13           |
| <b>FUNDING</b>                |    |                                                                                                                                                                                                          |                    |
| Funding                       | 27 | Describe sources of funding for the systematic review and other support (e.g., supply of data); role of funders for the systematic review.                                                               | 14                 |

From: Moher D, Liberati A, Tetzlaff J, Altman DG, The PRISMA Group (2009). Preferred Reporting Items for Systematic Reviews and Meta-Analyses: The PRISMA Statement. PLoS Med 6(6): e1000097. doi:10.1371/journal.pmed1000097

For more information, visit: [www.prisma-statement.org](http://www.prisma-statement.org).

Page 2 of 2

For peer review only - <http://bmjopen.bmj.com/site/about/guidelines.xhtml>
