# Supplementary material for: Support for midlife anxiety diagnosis as an independent risk factor for dementia: a systematic review
Source: PubMed Central journal article supplement — BMJ Open. 2018 Apr 30;8(4):e019399. doi: 10.1136/bmjopen-2017-019399 (PMC5969723; doi:10.1136/bmjopen-2017-019399), 2018-04-30
Supplement: bmjopen-2017-019399supp001.pdf [file bmjopen-2017-019399supp001.pdf]

## Example Search Strategy

Search carried out in Ovid MEDLINE(R) from 1946 to October Week 3 2017

| #  | Searches                                                                                                                                 | Results |
|----|------------------------------------------------------------------------------------------------------------------------------------------|---------|
| 1  | dement*.mp. [mp=ti, ot, ab, tx, kw, ct, sh, nm, hw, kf, px, rx, an, ui, eu, pm, sy, tc, id, tm, tn, dm, mf, dv, fs]                      | 101878  |
| 2  | limit 1 to (english language and humans)                                                                                                 | 84635   |
| 3  | alzheimer*.mp. [mp=ti, ot, ab, tx, kw, ct, sh, nm, hw, kf, px, rx, an, ui, eu, pm, sy, tc, id, tm, tn, dm, mf, dv, fs]                   | 123908  |
| 4  | limit 3 to (english language and humans)                                                                                                 | 98174   |
| 5  | mild cognitive impairment.mp. [mp=ti, ot, ab, tx, kw, ct, sh, nm, hw, kf, px, rx, an, ui, eu, pm, sy, tc, id, tm, tn, dm, mf, dv, fs]    | 10469   |
| 6  | limit 5 to (english language and humans)                                                                                                 | 9789    |
| 7  | MCI.mp. [mp=ti, ot, ab, tx, kw, ct, sh, nm, hw, kf, px, rx, an, ui, eu, pm, sy, tc, id, tm, tn, dm, mf, dv, fs]                          | 12968   |
| 8  | limit 7 to (english language and humans)                                                                                                 | 10517   |
| 9  | 2 OR 4 OR 6 OR 8                                                                                                                         | 155363  |
| 10 | anx*.mp. [mp=ti, ot, ab, tx, kw, ct, sh, nm, hw, kf, px, rx, an, ui, eu, pm, sy, tc, id, tm, tn, dm, mf, dv, fs]                         | 196896  |
| 11 | limit 10 to (english language and humans)                                                                                                | 154215  |
| 12 | generalised anxiety disorder.mp. [mp=ti, ot, ab, tx, kw, ct, sh, nm, hw, kf, px, rx, an, ui, eu, pm, sy, tc, id, tm, tn, dm, mf, dv, fs] | 475     |
| 13 | limit 12 to (english language and humans)                                                                                                | 438     |
| 14 | GAD.mp. [mp=ti, ot, ab, tx, kw, ct, sh, nm, hw, kf, px, rx, an, ui, eu, pm, sy, tc, id, tm, tn, dm, mf, dv, fs]                          | 7550    |
| 15 | limit 14 to (english language and humans)                                                                                                | 4299    |
| 16 | 11 OR 13 OR 15                                                                                                                           | 156261  |
| 17 | risk*.mp. [mp=ti, ot, ab, tx, kw, ct, sh, nm, hw, kf, px, rx, an, ui, eu, pm, sy, tc, id, tm, tn, dm, mf, dv, fs]                        | 2086806 |
| 18 | limit 17 to (english language and humans)                                                                                                | 1757965 |
| 19 | odds.mp. [mp=ti, ot, ab, tx, kw, ct, sh, nm, hw, kf, px, rx, an, ui, eu, pm, sy, tc, id, tm, tn, dm, mf, dv, fs]                         | 268449  |
| 20 | limit 19 to (english language and humans)                                                                                                | 257505  |
| 21 | 18 OR 20                                                                                                                                 | 1849508 |
| 22 | 9 AND 16 AND 21                                                                                                                          | 776     |
